# Supplementary material for: A cradle-to-gate life cycle assessment of green methanol production using direct air capture
Source: Royal Society of Chemistry journal article supplement (doi:10.1039/d4ya00316k), 2024-01-01
Supplement: d4ya00316k2.xlsx [file d4ya00316k2.xlsx]

## Sheet: Title
A Cradle-to-Gate Life Cycle Assessment of Green Methanol Production Using Direct Air Capture
Nicholas Badger, Rahim Boylu, Mustafa Erguvan, Shahriar Amini
Supplemental Information 2: Life Cycle Assessment Results

## Sheet: GWP Contributions
Impact category	Unit	MW, Grid	Waste Heat, Grid	MW, PV (AL)	Waste Heat, PV (AL)	MW, PV (AZ)	Waste Heat, PV (AZ)	MW, Wind	Waste Heat, Wind	MW, Hydro	Waste Heat, Hydro	MW, Geothermal	Waste Heat, Geothermal	SMR
Ozone depletion	kg CFC-11 eq	4.77687e-07	4.40333e-07	1.26815e-07	1.35281e-07	1.0057e-07	1.20024e-07	7.75141e-09	3.17825e-08	-2.91156e-09	2.25124e-08	3.73673e-08	5.75298e-08	2.32754e-07		Calculation:	Compare
Global warming	kg CO2 eq	5.57454	4.80408	-1.35748	-1.22257	-1.5993	-1.30788	-2.38662	-2.11715	-2.53183	-2.24339	-1.47147	-1.32155	0.943737		Results:	Impact assessment
Smog	kg O3 eq	0.175922	0.158154	0.04261	0.0422489	0.0295543	0.0383533	-0.0117158	-0.0049743	-0.0187118	-0.0110565	0.0342757	0.0350096	0.0250583		Product 1:	1 p LCA per kg - MW - Grid (of project Nick - DAC + Methanol LCA kg Methanol 3.0)
Acidification	kg SO2 eq	0.0203513	0.0185779	0.00649927	0.00653458	0.00531725	0.00638834	0.00140883	0.00210973	0.00069789	0.00149165	0.00482715	0.00508153	0.0019893		Product 2:	1 p LCA per kg - Waste Heat - Grid (of project Nick - DAC + Methanol LCA kg Methanol 3.0)
Eutrophication	kg N eq	0.0417508	0.0364749	0.00414364	0.00377961	0.00320937	0.00337445	0.000190762	0.000343631	-0.000521826	-0.000275875	0.00297581	0.00276488	0.000550764		Product 3:	1 p LCA per kg - MW - PV - AL (of project Nick - DAC + Methanol LCA kg Methanol 3.0)
Carcinogenics	CTUh	1.47642e-06	1.40998e-06	1.22154e-06	1.18836e-06	1.16874e-06	1.20165e-06	1.15643e-06	1.13178e-06	9.89685e-07	9.86823e-07	1.24302e-06	1.20707e-06	2.47906e-08		Product 4:	1 p LCA per kg - Waste Heat - PV - AL (of project Nick - DAC + Methanol LCA kg Methanol 3.0)
Non carcinogenics	CTUh	3.01607e-06	2.81528e-06	2.00255e-06	1.93407e-06	1.86146e-06	1.86004e-06	1.40777e-06	1.41706e-06	1.29193e-06	1.31636e-06	1.53719e-06	1.52958e-06	5.82386e-08		Product 5:	1 p LCA per kg - MW - PV - AZ (of project Nick - DAC + Methanol LCA kg Methanol 3.0)
Respiratory effects	kg PM2.5 eq	0.0142538	0.0123463	0.000268621	0.000187758	5.7702e-06	9.33111e-05	-0.000807618	-0.000747756	-0.000950013	-0.000871551	0.000162577	9.57067e-05	0.000206982		Product 6:	1 p LCA per kg - Waste Heat - PV - AZ (of project Nick - DAC + Methanol LCA kg Methanol 3.0)
Ecotoxicity	CTUe	189.21	178.332	198.771	186.635	182.901	175.482	147.916	142.432	118.655	116.993	132.768	129.263	3.65404		Product 7:	1 p LCA per kg - MW - Wind (of project Nick - DAC + Methanol LCA kg Methanol 3.0)
Fossil fuel depletion	MJ surplus	7.12403	6.55818	0.439565	0.746775	0.240765	0.656001	-0.372601	0.0407937	-0.528968	-0.0951475	0.114803	0.46453	5.05798		Product 8:	1 p LCA per kg - Waste Heat - Wind (of project Nick - DAC + Methanol LCA kg Methanol 3.0)
																Product 9:	1 p LCA per kg - MW - Hydro (of project Nick - DAC + Methanol LCA kg Methanol 3.0)
																Product 10:	1 p LCA per kg - Waste Heat - Hydro (of project Nick - DAC + Methanol LCA kg Methanol 3.0)
Global warming	kg CO2 eq															Product 11:	1 p LCA per kg - MW - Geothermal (of project Nick - DAC + Methanol LCA kg Methanol 3.0)
Process		MW, Grid	Waste Heat, Grid	MW, PV (AL)	Waste Heat, PV (AL)	MW, PV (AZ)	Waste Heat, PV (AZ)	MW, Wind	Waste Heat, Wind	MW, Hydro	Waste Heat, Hydro	MW, Geothermal	Waste Heat, Geothermal			Product 12:	1 p LCA per kg - Waste Heat - Geothermal (of project Nick - DAC + Methanol LCA kg Methanol 3.0)
Construction		0.791449	0.787588	2.03323	1.86704	1.79181	1.78208	0.791449	0.787588	0.791449	0.787588	0.791449	0.787588			Product 13:	1 p Generic Methanol Production (of project Nick - DAC + Methanol LCA kg Methanol 3.0)
DAC Processes		0.0665179	-0.700084	-1.446	-1.14463	-1.446	-1.14463	-1.40628	-1.13295	-1.43314	-1.14085	-1.23698	-1.08319			Method:	TRACI 2.1 Updated V1.07 / US 2008
Hydrogen Production		6.54803	6.54803	0.0011485	0.0011485	0.0011485	0.0011485	0.172981	0.172981	0.0567729	0.0567729	0.905354	0.905354			Indicator:	Characterization
Credit for O2		-2.02803	-2.02803	-2.02803	-2.02803	-2.02803	-2.02803	-2.02803	-2.02803	-2.02803	-2.02803	-2.02803	-2.02803			Skip categories:	Never
Methanol Production		0.193191	0.193191	0.0729415	0.0729415	0.0729415	0.0729415	0.0761023	0.0761023	0.0739646	0.0739646	0.0895741	0.0895741			Exclude infrastructure processes:	No
Zeolite Life Cycle		0.00712792	0.00712792	0.00712792	0.00712792	0.00712792	0.00712792	0.00712792	0.00712792	0.00712792	0.00712792	0.00712792	0.00712792			Exclude long-term emissions:	No
DAC EOL Processes		3.36956e-05	3.36956e-05	0.0021037	0.0018337	0.0017037	0.0014837	3.36956e-05	3.36956e-05	3.36956e-05	3.36956e-05	3.36956e-05	3.36956e-05			Sorted on item:	Impact category
Sum		5.57832	4.80786	-1.35748	-1.22257	-1.5993	-1.30788	-2.38662	-2.11715	-2.53183	-2.24339	-1.47147	-1.32155			Sort order:	Ascending
Maximum		6.54803	6.54803	2.03323	1.86704	1.79181	1.78208	0.791449	0.787588	0.791449	0.787588	0.905354	0.905354
																Impact category	Unit	LCA per kg - MW - Grid	LCA per kg - Waste Heat - Grid	LCA per kg - MW - PV - AL	LCA per kg - Waste Heat - PV - AL	LCA per kg - MW - PV - AZ	LCA per kg - Waste Heat - PV - AZ	LCA per kg - MW - Wind	LCA per kg - Waste Heat - Wind	LCA per kg - MW - Hydro	LCA per kg - Waste Heat - Hydro	LCA per kg - MW - Geothermal	LCA per kg - Waste Heat - Geothermal	Generic Methanol Production
																Ozone depletion	kg CFC-11 eq	4.77687e-07	4.40333e-07	1.26815e-07	1.35281e-07	1.0057e-07	1.20024e-07	7.75141e-09	3.17825e-08	-2.91156e-09	2.25124e-08	3.73673e-08	5.75298e-08	2.32754e-07
																Global warming	kg CO2 eq	5.57454	4.80408	-1.35748	-1.22257	-1.5993	-1.30788	-2.38662	-2.11715	-2.53183	-2.24339	-1.47147	-1.32155	0.943737
																Smog	kg O3 eq	0.175922	0.158154	0.04261	0.0422489	0.0295543	0.0383533	-0.0117158	-0.0049743	-0.0187118	-0.0110565	0.0342757	0.0350096	0.0250583
																Acidification	kg SO2 eq	0.0203513	0.0185779	0.00649927	0.00653458	0.00531725	0.00638834	0.00140883	0.00210973	0.00069789	0.00149165	0.00482715	0.00508153	0.0019893
																Eutrophication	kg N eq	0.0417508	0.0364749	0.00414364	0.00377961	0.00320937	0.00337445	0.000190762	0.000343631	-0.000521826	-0.000275875	0.00297581	0.00276488	0.000550764
																Carcinogenics	CTUh	1.47642e-06	1.40998e-06	1.22154e-06	1.18836e-06	1.16874e-06	1.20165e-06	1.15643e-06	1.13178e-06	9.89685e-07	9.86823e-07	1.24302e-06	1.20707e-06	2.47906e-08
																Non carcinogenics	CTUh	3.01607e-06	2.81528e-06	2.00255e-06	1.93407e-06	1.86146e-06	1.86004e-06	1.40777e-06	1.41706e-06	1.29193e-06	1.31636e-06	1.53719e-06	1.52958e-06	5.82386e-08
																Respiratory effects	kg PM2.5 eq	0.0142538	0.0123463	0.000268621	0.000187758	5.7702e-06	9.33111e-05	-0.000807618	-0.000747756	-0.000950013	-0.000871551	0.000162577	9.57067e-05	0.000206982
																Ecotoxicity	CTUe	189.21	178.332	198.771	186.635	182.901	175.482	147.916	142.432	118.655	116.993	132.768	129.263	3.65404
																Fossil fuel depletion	MJ surplus	7.12403	6.55818	0.439565	0.746775	0.240765	0.656001	-0.372601	0.0407937	-0.528968	-0.0951475	0.114803	0.46453	5.05798

## Sheet: MW vs Waste Heat
Impact category	Unit	MW, Grid	Waste Heat, Grid	MW, PV (AL)	Waste Heat, PV (AL)	MW, PV (AZ)	Waste Heat, PV (AZ)	MW, Wind	Waste Heat, Wind	MW, Hydro	Waste Heat, Hydro	MW, Geothermal	Waste Heat, Geothermal	SMR
Ozone depletion	kg CFC-11 eq	4.77687e-07	4.40333e-07	1.26815e-07	1.35281e-07	1.0057e-07	1.20024e-07	7.75141e-09	3.17825e-08	-2.91156e-09	2.25124e-08	3.73673e-08	5.75298e-08	2.32754e-07
Global warming	kg CO2 eq	5.57454	4.80408	-1.35748	-1.22257	-1.5993	-1.30788	-2.38662	-2.11715	-2.53183	-2.24339	-1.47147	-1.32155	0.943737
Smog	kg O3 eq	0.175922	0.158154	0.04261	0.0422489	0.0295543	0.0383533	-0.0117158	-0.0049743	-0.0187118	-0.0110565	0.0342757	0.0350096	0.0250583
Acidification	kg SO2 eq	0.0203513	0.0185779	0.00649927	0.00653458	0.00531725	0.00638834	0.00140883	0.00210973	0.00069789	0.00149165	0.00482715	0.00508153	0.0019893
Eutrophication	kg N eq	0.0417508	0.0364749	0.00414364	0.00377961	0.00320937	0.00337445	0.000190762	0.000343631	-0.000521826	-0.000275875	0.00297581	0.00276488	0.000550764
Carcinogenics	CTUh	1.47642e-06	1.40998e-06	1.22154e-06	1.18836e-06	1.16874e-06	1.20165e-06	1.15643e-06	1.13178e-06	9.89685e-07	9.86823e-07	1.24302e-06	1.20707e-06	2.47906e-08
Non carcinogenics	CTUh	3.01607e-06	2.81528e-06	2.00255e-06	1.93407e-06	1.86146e-06	1.86004e-06	1.40777e-06	1.41706e-06	1.29193e-06	1.31636e-06	1.53719e-06	1.52958e-06	5.82386e-08
Respiratory effects	kg PM2.5 eq	0.0142538	0.0123463	0.000268621	0.000187758	5.7702e-06	9.33111e-05	-0.000807618	-0.000747756	-0.000950013	-0.000871551	0.000162577	9.57067e-05	0.000206982
Ecotoxicity	CTUe	189.21	178.332	198.771	186.635	182.901	175.482	147.916	142.432	118.655	116.993	132.768	129.263	3.65404
Fossil fuel depletion	MJ surplus	7.12403	6.55818	0.439565	0.746775	0.240765	0.656001	-0.372601	0.0407937	-0.528968	-0.0951475	0.114803	0.46453	5.05798
Impact category	Unit	MW, Grid	Waste Heat, Grid	MW, PV (AL)	Waste Heat, PV (AL)	MW, PV (AZ)	Waste Heat, PV (AZ)	MW, Wind	Waste Heat, Wind	MW, Hydro	Waste Heat, Hydro	MW, Geothermal	Waste Heat, Geothermal	SMR
Ozone depletion	kg CFC-11 eq	1	0.921802	0.265477	0.283199	0.210535	0.251261	0.0162269	0.0665341	-0.00609511	0.0471278	0.0782255	0.120434	0.487251
Global warming	kg CO2 eq	1	0.861789	-0.243514	-0.219313	-0.286894	-0.234616	-0.428128	-0.379789	-0.454176	-0.402435	-0.263963	-0.237068	0.169294
Smog	kg O3 eq	1	0.898997	0.242209	0.240156	0.167996	0.218012	-0.0665965	-0.0282755	-0.106364	-0.0628485	0.194834	0.199006	0.14244
Acidification	kg SO2 eq	1	0.912857	0.319354	0.321089	0.261273	0.313903	0.0692257	0.103666	0.0342921	0.0732952	0.237191	0.24969	0.0977479
Eutrophication	kg N eq	1	0.873633	0.0992468	0.0905279	0.0768697	0.0808236	0.00456905	0.00823051	-0.0124986	-0.00660766	0.0712754	0.0662233	0.0131917
Carcinogenics	CTUh	1	0.954998	0.827367	0.804896	0.791601	0.813897	0.783263	0.766572	0.670328	0.668389	0.841917	0.817564	0.016791
Non carcinogenics	CTUh	1	0.933427	0.66396	0.641254	0.617181	0.616709	0.466756	0.469838	0.42835	0.436449	0.509667	0.507144	0.0193094
Respiratory effects	kg PM2.5 eq	1	0.866174	0.0188456	0.0131725	0.000404818	0.00654639	-0.0566598	-0.0524601	-0.0666497	-0.0611451	0.0114058	0.00671446	0.0145212
Ecotoxicity	CTUe	0.951896	0.897171	1	0.938942	0.920156	0.882834	0.74415	0.716561	0.596942	0.588582	0.667945	0.65031	0.0183832
Fossil fuel depletion	MJ surplus	1	0.920571	0.0617016	0.104825	0.0337962	0.0920828	-0.052302	0.00572621	-0.0742511	-0.0133558	0.0161148	0.0652061	0.709988
Energy Source	MW	Waste Heat
Grid	5.57454	4.80408
PV (AL)	-1.35748	-1.22257
PV (AZ)	-1.5993	-1.30788
Wind	-2.38662	-2.11715
Hydro	-2.53183	-2.24339
Geothermal	-1.47147	-1.32155

## Sheet: Relative - Grid
Impact Category	Unit	MW, Grid	Waste Heat, Grid
Ozone depletion	kg CFC-11 eq	4.77687e-07	4.40333e-07
Global warming	kg CO2 eq	5.57454	4.80408
Smog	kg O3 eq	0.175922	0.158154
Acidification	kg SO2 eq	0.0203513	0.0185779
Eutrophication	kg N eq	0.0417508	0.0364749
Carcinogenics	CTUh	1.47642e-06	1.40998e-06
Non carcinogenics	CTUh	3.01607e-06	2.81528e-06
Respiratory effects	kg PM2.5 eq	0.0142538	0.0123463
Ecotoxicity	CTUe	189.21	178.332
Fossil fuel depletion	MJ surplus	7.12403	6.55818
Impact category	Unit	MW, Grid	Waste Heat, Grid
Ozone depletion	kg CFC-11 eq	1	0.921802
Global warming	kg CO2 eq	1	0.861789
Smog	kg O3 eq	1	0.898997
Acidification	kg SO2 eq	1	0.912857
Eutrophication	kg N eq	1	0.873633
Carcinogenics	CTUh	1	0.954998
Non carcinogenics	CTUh	1	0.933427
Respiratory effects	kg PM2.5 eq	1	0.866174
Ecotoxicity	CTUe	1	0.942509
Fossil fuel depletion	MJ surplus	1	0.920571

## Sheet: Relative - PV (AL)
Impact Category	Unit	MW, PV (AL)	Waste Heat, PV (AL)
Ozone depletion	kg CFC-11 eq	1.26815e-07	1.35281e-07
Global warming	kg CO2 eq	-1.35748	-1.22257
Smog	kg O3 eq	0.04261	0.0422489
Acidification	kg SO2 eq	0.00649927	0.00653458
Eutrophication	kg N eq	0.00414364	0.00377961
Carcinogenics	CTUh	1.22154e-06	1.18836e-06
Non carcinogenics	CTUh	2.00255e-06	1.93407e-06
Respiratory effects	kg PM2.5 eq	0.000268621	0.000187758
Ecotoxicity	CTUe	198.771	186.635
Fossil fuel depletion	MJ surplus	0.439565	0.746775
Impact category	Unit	MW, PV (AL)	Waste Heat, PV (AL)
Ozone depletion	kg CFC-11 eq	0.937419	1
Global warming	kg CO2 eq	-1	-0.900618
Smog	kg O3 eq	1	0.991524
Acidification	kg SO2 eq	0.994596	1
Eutrophication	kg N eq	1	0.912149
Carcinogenics	CTUh	1	0.97284
Non carcinogenics	CTUh	1	0.965802
Respiratory effects	kg PM2.5 eq	1	0.698971
Ecotoxicity	CTUe	1	0.938942
Fossil fuel depletion	MJ surplus	0.588617	1

## Sheet: Relative - PV (AZ)
Impact Category	Unit	MW, PV (AZ)	Waste Heat, PV (AZ)
Ozone depletion	kg CFC-11 eq	1.0057e-07	1.20024e-07
Global warming	kg CO2 eq	-1.5993	-1.30788
Smog	kg O3 eq	0.0295543	0.0383533
Acidification	kg SO2 eq	0.00531725	0.00638834
Eutrophication	kg N eq	0.00320937	0.00337445
Carcinogenics	CTUh	1.16874e-06	1.20165e-06
Non carcinogenics	CTUh	1.86146e-06	1.86004e-06
Respiratory effects	kg PM2.5 eq	5.7702e-06	9.33111e-05
Ecotoxicity	CTUe	182.901	175.482
Fossil fuel depletion	MJ surplus	0.240765	0.656001
Impact category	Unit	MW, PV (AZ)	Waste Heat, PV (AZ)
Ozone depletion	kg CFC-11 eq	0.837914	1
Global warming	kg CO2 eq	-1	-0.81778
Smog	kg O3 eq	0.770581	1
Acidification	kg SO2 eq	0.832337	1
Eutrophication	kg N eq	0.95108	1
Carcinogenics	CTUh	0.972605	1
Non carcinogenics	CTUh	1	0.999235
Respiratory effects	kg PM2.5 eq	0.0618383	1
Ecotoxicity	CTUe	1	0.95944
Fossil fuel depletion	MJ surplus	0.36702	1

## Sheet: Relative - Hydro
Impact category	Unit	MW, Hydro	Waste Heat, Hydro
Ozone depletion	kg CFC-11 eq	-2.91156e-09	2.25124e-08
Global warming	kg CO2 eq	-2.53183	-2.24339
Smog	kg O3 eq	-0.0187118	-0.0110565
Acidification	kg SO2 eq	0.00069789	0.00149165
Eutrophication	kg N eq	-0.000521826	-0.000275875
Carcinogenics	CTUh	9.89685e-07	9.86823e-07
Non carcinogenics	CTUh	1.29193e-06	1.31636e-06
Respiratory effects	kg PM2.5 eq	-0.000950013	-0.000871551
Ecotoxicity	CTUe	118.655	116.993
Fossil fuel depletion	MJ surplus	-0.528968	-0.0951475
Impact category	Unit	MW, Hydro	Waste Heat, Hydro
Ozone depletion	kg CFC-11 eq	-0.129332	1
Global warming	kg CO2 eq	-1	-0.886077
Smog	kg O3 eq	-1	-0.59088
Acidification	kg SO2 eq	0.467863	1
Eutrophication	kg N eq	-1	-0.528673
Carcinogenics	CTUh	1	0.997108
Non carcinogenics	CTUh	0.981444	1
Respiratory effects	kg PM2.5 eq	-1	-0.917409
Ecotoxicity	CTUe	1	0.985996
Fossil fuel depletion	MJ surplus	-1	-0.179874

## Sheet: Relative - Wind
Impact category	Unit	MW, Wind	Waste Heat, Wind
Ozone depletion	kg CFC-11 eq	7.75141e-09	3.17825e-08
Global warming	kg CO2 eq	-2.38662	-2.11715
Smog	kg O3 eq	-0.0117158	-0.0049743
Acidification	kg SO2 eq	0.00140883	0.00210973
Eutrophication	kg N eq	0.000190762	0.000343631
Carcinogenics	CTUh	1.15643e-06	1.13178e-06
Non carcinogenics	CTUh	1.40777e-06	1.41706e-06
Respiratory effects	kg PM2.5 eq	-0.000807618	-0.000747756
Ecotoxicity	CTUe	147.916	142.432
Fossil fuel depletion	MJ surplus	-0.372601	0.0407937
Impact category	Unit	MW, Wind	Waste Heat, Wind
Ozone depletion	kg CFC-11 eq	0.243889	1
Global warming	kg CO2 eq	-1	-0.887094
Smog	kg O3 eq	-1	-0.424579
Acidification	kg SO2 eq	0.667779	1
Eutrophication	kg N eq	0.555136	1
Carcinogenics	CTUh	1	0.978691
Non carcinogenics	CTUh	0.99344	1
Respiratory effects	kg PM2.5 eq	-1	-0.925879
Ecotoxicity	CTUe	1	0.962926
Fossil fuel depletion	MJ surplus	-1	1

## Sheet: Relative - Geothermal
Impact category	Unit	MW, Geothermal	Waste Heat, Geothermal
Ozone depletion	kg CFC-11 eq	3.73673e-08	5.75298e-08
Global warming	kg CO2 eq	-1.47147	-1.32155
Smog	kg O3 eq	0.0342757	0.0350096
Acidification	kg SO2 eq	0.00482715	0.00508153
Eutrophication	kg N eq	0.00297581	0.00276488
Carcinogenics	CTUh	1.24302e-06	1.20707e-06
Non carcinogenics	CTUh	1.53719e-06	1.52958e-06
Respiratory effects	kg PM2.5 eq	0.000162577	9.57067e-05
Ecotoxicity	CTUe	132.768	129.263
Fossil fuel depletion	MJ surplus	0.114803	0.46453
Impact category	Unit	MW, Geothermal	Waste Heat, Geothermal
Ozone depletion	kg CFC-11 eq	0.649529	1
Global warming	kg CO2 eq	-1	-0.898113
Smog	kg O3 eq	0.979038	1
Acidification	kg SO2 eq	0.94994	1
Eutrophication	kg N eq	1	0.929119
Carcinogenics	CTUh	1	0.971075
Non carcinogenics	CTUh	1	0.995049
Respiratory effects	kg PM2.5 eq	1	0.588687
Ecotoxicity	CTUe	1	0.973599
Fossil fuel depletion	MJ surplus	0.247137	1

## Sheet: Relative - MW
Impact category	Unit	MW, Grid	MW, PV (AL)	MW, PV (AZ)	MW, Wind	MW, Hydro	MW, Geothermal	SMR
Ozone depletion	kg CFC-11 eq	4.77687e-07	1.26815e-07	1.0057e-07	7.75141e-09	-2.91156e-09	3.73673e-08	2.32754e-07
Global warming	kg CO2 eq	5.57454	-1.35748	-1.5993	-2.38662	-2.53183	-1.47147	0.943737
Smog	kg O3 eq	0.175922	0.04261	0.0295543	-0.0117158	-0.0187118	0.0342757	0.0250583
Acidification	kg SO2 eq	0.0203513	0.00649927	0.00531725	0.00140883	0.00069789	0.00482715	0.0019893
Eutrophication	kg N eq	0.0417508	0.00414364	0.00320937	0.000190762	-0.000521826	0.00297581	0.000550764
Carcinogenics	CTUh	1.47642e-06	1.22154e-06	1.16874e-06	1.15643e-06	9.89685e-07	1.24302e-06	2.47906e-08
Non carcinogenics	CTUh	3.01607e-06	2.00255e-06	1.86146e-06	1.40777e-06	1.29193e-06	1.53719e-06	5.82386e-08
Respiratory effects	kg PM2.5 eq	0.0142538	0.000268621	5.7702e-06	-0.000807618	-0.000950013	0.000162577	0.000206982
Ecotoxicity	CTUe	189.21	198.771	182.901	147.916	118.655	132.768	3.65404
Fossil fuel depletion	MJ surplus	7.12403	0.439565	0.240765	-0.372601	-0.528968	0.114803	5.05798
Impact category	Unit	MW, Grid	MW, PV (AL)	MW, PV (AZ)	MW, Wind	MW, Hydro	MW, Geothermal	SMR
Ozone depletion	kg CFC-11 eq	1	0.265477	0.210535	0.0162269	-0.00609511	0.0782255	0.487251
Global warming	kg CO2 eq	1	-0.243514	-0.286894	-0.428128	-0.454176	-0.263963	0.169294
Smog	kg O3 eq	1	0.242209	0.167996	-0.0665965	-0.106364	0.194834	0.14244
Acidification	kg SO2 eq	1	0.319354	0.261273	0.0692257	0.0342921	0.237191	0.0977479
Eutrophication	kg N eq	1	0.0992468	0.0768697	0.00456905	-0.0124986	0.0712754	0.0131917
Carcinogenics	CTUh	1	0.827367	0.791601	0.783263	0.670328	0.841917	0.016791
Non carcinogenics	CTUh	1	0.66396	0.617181	0.466756	0.42835	0.509667	0.0193094
Respiratory effects	kg PM2.5 eq	1	0.0188456	0.000404818	-0.0566598	-0.0666497	0.0114058	0.0145212
Ecotoxicity	CTUe	0.951896	1	0.920156	0.74415	0.596942	0.667945	0.0183832
Fossil fuel depletion	MJ surplus	1	0.0617016	0.0337962	-0.052302	-0.0742511	0.0161148	0.709988

[truncated: 1 more sheets: Relative - Waste Heat]
