# Supplementary material for: A cradle-to-gate life cycle assessment of green methanol production using direct air capture
Source: Royal Society of Chemistry journal article supplement (doi:10.1039/d4ya00316k), 2024-01-01
Supplement: d4ya00316k3.xlsx [file d4ya00316k3.xlsx]

## Sheet: Title
A Cradle-to-Gate Life Cycle Assessment of Green Methanol Production Using Direct Air Capture
Nicholas Badger, Rahim Boylu, Mustafa Erguvan, Shahriar Amini
Supplemental Information 3: Life Cycle Inventory and LCA Processes

## Sheet: Grid+MW
Calculation:	Analyze							Calculation:	Analyze									Calculation:	Analyze
Results:	Impact assessment							Results:	Impact assessment									Results:	Impact assessment
Product:	1 p LCA per kg - MW - Grid (of project Nick - DAC + Methanol LCA kg Methanol 3.0)							Product:	1 kg Methanol Production - MW - Grid (of project Nick - DAC + Methanol LCA kg Methanol 3.0)									Product:	0.208 kg Hydrogen Gas Production - MW - Grid (of project Nick - DAC + Methanol LCA kg Methanol 3.0)
Method:	TRACI 2.1 Updated V1.07 / US 2008							Method:	TRACI 2.1 Updated V1.07 / US 2008									Method:	TRACI 2.1 Updated V1.07 / US 2008
Indicator:	Characterization							Indicator:	Characterization									Indicator:	Characterization
Skip categories:	Never							Skip categories:	Never									Skip categories:	Never
Exclude infrastructure processes:	No							Exclude infrastructure processes:	No									Exclude infrastructure processes:	No
Exclude long-term emissions:	No							Exclude long-term emissions:	No									Exclude long-term emissions:	No
Sorted on item:	Impact category							Sorted on item:	Impact category									Sorted on item:	Impact category
Sort order:	Ascending							Sort order:	Ascending									Sort order:	Ascending
Impact category	Unit	Total	DAC Construction Total - no PV (MW)	Methanol Production - MW - Grid	DAC EOL	Zeolite Life Cycle		Impact category	Unit	Total	Methanol Production - MW - Grid	Hydrogen Gas Production - MW - Grid	CO2 From DAC - MW - Grid	Copper-rich materials {GLO}| copper, anode to generic market for copper-rich materials | Cut-off, S	Electricity, medium voltage {US}| market group for | Cut-off, S	Wastewater, unpolluted {RoW}| market for wastewater, unpolluted | Cut-off, S		Impact category	Unit	Total	Hydrogen Gas Production - MW - Grid	Water, deionised {RoW}| market for water, deionised | Cut-off, S	Electricity, medium voltage {US}| market group for | Cut-off, S	Oxygen, liquid {RoW}| air separation, cryogenic | Cut-off, S	Wastewater, unpolluted {RoW}| market for wastewater, unpolluted | Cut-off, S
Ozone depletion	kg CFC-11 eq	4.77687e-07	5.44373e-08	4.21713e-07	1.11905e-11	1.52634e-09		Ozone depletion	kg CFC-11 eq	4.21713e-07	0	3.24657e-07	8.98855e-08	5.87438e-12	7.15258e-09	1.15706e-11		Ozone depletion	kg CFC-11 eq	3.24657e-07	0	5.20769e-10	3.88836e-07	-6.47041e-08	4.52728e-12
Global warming	kg CO2 eq	5.57454	0.791449	4.77593	3.36956e-05	0.00712792		Global warming	kg CO2 eq	4.77593	0.07264	4.51612	0.0665179	0.000108121	0.120358	0.000193295		Global warming	kg CO2 eq	4.51612	0	0.00107295	6.543	-2.02803	7.56312e-05
Smog	kg O3 eq	0.175922	0.0734586	0.102068	5.43624e-06	0.000390907		Smog	kg O3 eq	0.102068	0	0.0619946	0.0370862	2.41141e-05	0.00295111	1.15132e-05		Smog	kg O3 eq	0.0619946	0	5.76698e-05	0.160431	-0.0984989	4.50482e-06
Acidification	kg SO2 eq	0.0203513	0.00794665	0.0123729	2.20104e-07	3.15754e-05		Acidification	kg SO2 eq	0.0123729	0	0.00838176	0.0036873	9.69121e-06	0.000293415	6.91734e-07		Acidification	kg SO2 eq	0.00838176	0	7.01759e-06	0.0159509	-0.00757643	2.70657e-07
Eutrophication	kg N eq	0.0417508	0.00513986	0.036583	1.86357e-07	2.77471e-05		Eutrophication	kg N eq	0.036583	0	0.0281071	0.00784615	4.53745e-06	0.000624352	8.7095e-07		Eutrophication	kg N eq	0.0281071	0	3.59029e-06	0.0339417	-0.00583848	3.4078e-07
Carcinogenics	CTUh	1.47642e-06	1.04382e-06	4.29745e-07	2.11662e-12	2.85782e-09		Carcinogenics	CTUh	4.29745e-07	0	3.24409e-07	9.73978e-08	9.20478e-11	7.75036e-09	9.66484e-11		Carcinogenics	CTUh	3.24409e-07	0	1.74758e-10	4.21333e-07	-9.71373e-08	3.7816e-11
Non carcinogenics	CTUh	3.01607e-06	1.60301e-06	1.40833e-06	3.37324e-11	4.6973e-09		Non carcinogenics	CTUh	1.40833e-06	0	1.05856e-06	3.21735e-07	2.36753e-09	2.56018e-08	6.6493e-11		Non carcinogenics	CTUh	1.05856e-06	0	7.49745e-10	1.39179e-06	-3.34011e-07	2.60169e-11
Respiratory effects	kg PM2.5 eq	0.0142538	0.00159544	0.0126528	2.92029e-08	5.52923e-06		Respiratory effects	kg PM2.5 eq	0.0126528	0	0.00958848	0.00283734	9.97937e-07	0.000225779	2.1799e-07		Respiratory effects	kg PM2.5 eq	0.00958848	0	1.23054e-06	0.012274	-0.00268687	8.52936e-08
Ecotoxicity	CTUe	189.21	128.58	59.9473	0.363807	0.318554		Ecotoxicity	CTUe	59.9473	0	45.3907	13.3306	0.159676	1.06078	0.00548362		Ecotoxicity	CTUe	45.3907	0	0.0457981	57.6671	-12.3243	0.00214559
Fossil fuel depletion	MJ surplus	7.12403	0.627074	6.49025	0.000106419	0.00660588		Fossil fuel depletion	MJ surplus	6.49025	0	4.95074	1.42579	8.89274e-05	0.113456	0.000172612		Fossil fuel depletion	MJ surplus	4.95074	0	0.00107893	6.16782	-1.21823	6.75384e-05
Outputs:	Amount	Unit	Comments	Source
CO2 From DAC - MW - Grid	1	kg		Definition
Avoided Products:	Amount	Unit	Comments	Source
Inputs - Materials:	Amount	Unit	Comments	Source
Inputs - Electricity/Heat	Amount	Unit	Comments	Source
Electricity, medium voltage {US}| market group for | Cut-off, S	0.555	kWh	Blowers/other electrical	Simon 2023
Electricity, medium voltage {US}| market group for | Cut-off, S	4.8	MJ	MW heat load	Erguvan 2024
Emissions to Air	Amount	Unit	Comments	Source
Carbon dioxide	-1	kg		Definition
Assembly:	Amount	Units	Comments	Source
DAC Construction Total - no PV (MW)	1	p
Inputs:	Amount	Units	Comments	Source
Concrete block {RoW}| market for concrete block | Cut-off, S	260	ton
Steel, unalloyed {GLO}| market for | Cut-off, S	150000	kg
Aluminium, primary, ingot {IAI Area, North America}| market for aluminium, primary, ingot | Cut-off, S	64000	kg
Copper-rich materials {GLO}| market for copper-rich materials | Cut-off, S	500	kg
Stone wool {GLO}| market for stone wool | Cut-off, S	400	kg
Adhesive, for metal {RoW}| market for adhesive, for metal | Cut-off, S	80	kg
Alkyd paint, white, without solvent, in 60% solution state {RoW}| market for alkyd paint, white, without solvent, in 60% solution state | Cut-off, S	100	kg
Polyurethane, flexible foam {RoW}| market for polyurethane, flexible foam | Cut-off, S	100	kg
Calciner	1	p
Fan	6	p
Pellet Reactor	1	p
Slaker	1	p
Microwave oven {GLO}| market for microwave oven | Cut-off, S	3041.6	p	4000 tonnes/yr=114.2 kg/h, 114.2 kg/h*23.97 MJ/kg=760.4 kW
Methanol factory {GLO}| market for | Cut-off, S	0.973311	p	Scaled down to production rate of CO2
Processes:	Amount	Units	Comments	Source
Machine operation, diesel, < 18.64 kW, low load factor {GLO}| market for | Cut-off, S	500	hr	Construction equipment
Assembly:
Zeolite 13X Manufacturing
Materials:	Amount	Unit	Comments	Source
Zeolite, powder {GLO}| market for | Cut-off, S	1	g		Gonzalez-Olmos
Outputs:	Amount	Units	Comments	Source
Hydrogen Gas Production - HTHP - Grid	104	kg
Avoided Products:	Amount	Units	Comments	Source
Oxygen, liquid {RoW}| market for | Cut-off, S	821	kg		Aspen Model
Inputs - Materials:	Amount	Units	Comments	Source
Water, deionised {RoW}| market for water, deionised | Cut-off, S	1037	kg		Aspen Model
Inputs - Electricity/Heat:	Amount	Unit	Comments	Source
Electricity, medium voltage {US}| market group for | Cut-off, S	5906	kWh	Total electrical demand	Aspen Model
Emissions To Air:	Amount	Unit	Comments	Source
Carbon dioxide	0	kg		Aspen Model
Outputs: Waste	Amount	Unit	Comments	Source
Wastewater, unpolluted {RoW}| market for wastewater, unpolluted | Cut-off, S	0.1103	m3		Aspen Model
Outputs:	Amount	Units	Comments	Source
Methanol Production - MW - Grid	500	kg
Inputs - Materials:	Amount	Units	Comments	Source
Hydrogen Gas Production - HTHP - Grid	104	kg		Aspen Model
CO2 From DAC - MW - Grid	723	kg		Aspen Model
Copper-rich materials {GLO}| copper, anode to generic market for copper-rich materials | Cut-off, S	8.3447	g	Catalyst	Sollai 2023
Inputs - Electricity/Heat:	Amount	Unit	Comments	Source
Electricity, medium voltage {US}| market group for | Cut-off, S	108.64	kWh	Total electrical demand	Aspen Model
Emissions To Air:	Amount	Unit	Comments	Source
Carbon dioxide	36.32	kg		Aspen Model
Hydrogen	9.64	kg		Aspen Model
Outputs: Waste and Emissions:	Amount	Unit	Comments	Source
Wastewater, unpolluted {RoW}| market for wastewater, unpolluted | Cut-off, S	0.2819	m3
Life Cycle:	Amount	Unit	Comments	Source
Zeolite Life Cycle	1	p
Assembly:
Zeolite 13X Manufacturing	1	p
Waste/Disposal Scenario:
Zeolite 13X Sorbent EOL
Disposal Scenario:	Amount	Unit	Comments	Source
Zeolite 13X Sorbent EOL	1	p
Referring to Assembly:
Zeolite 13X Manufacturing
Waste Scenarios:	Percentage:		Comments	Source
Municipal solid waste (waste scenario) {RoW}| Treatment of municipal solid waste, landfill | Cut-off, S	1			Gonzalez-Olmos
Disposal Scenario:	Amount	Unit	Comments	Source
DAC EOL - no PV (MW)	1	p
Referring to Assembly:
DAC Construction Total - no PV
Waste Scenarios:	Percentage:		Comments	Source
DAC EOL	1
Waste Scenario:	Amount	Unit	Comments	Source
DAC EOL	1	kg
Materials and/or Waste Types:	Material/Waste Type	Percentage
Aluminium (waste treatment) {GLO}| recycling of aluminium | Cut-off, S	Aluminium	1
Steel and iron (waste treatment) {GLO}| recycling of steel and iron | Cut-off, S	Steel	1
Scrap copper {RoW}| treatment of, municipal incineration | Cut-off, S	Coppers	1
Waste concrete {RoW}| treatment of, inert material landfill | Cut-off, S	Cement	1
Waste Streams Remaining After Separation:	Percentage
Municipal solid waste (waste scenario) {RoW}| Treatment of municipal solid waste, landfill | Cut-off, S	1
Life Cycle:	Amount	Unit	Comments	Source
LCA per kg - MW - Grid	1	p
Assembly:
DAC Construction Total - no PV (MW)	1.90263e-08	p
Processes:	Amount	Unit	Comments	Source
Methanol Production - MW - Grid	1	kg
Waste/Disposal Scenario:			Comments	Source
DAC EOL - no PV (MW)
Additional Life Cycles:	Amount	Unit	Comments	Source
Zeolite Life Cycle	1.13945			Gonzalez-Olmos 2022

## Sheet: Grid+Waste Heat
Calculation:	Analyze							Calculation:	Analyze									Calculation:	Analyze
Results:	Impact assessment							Results:	Impact assessment									Results:	Impact assessment
Product:	1 p LCA per kg - Waste Heat - Grid (of project Nick - DAC + Methanol LCA kg Methanol 3.0)							Product:	1 kg Methanol Production - Waste Heat - Grid (of project Nick - DAC + Methanol LCA kg Methanol 3.0)									Product:	0.208 kg Hydrogen Gas Production - Waste Heat - Grid (of project Nick - DAC + Methanol LCA kg Methanol 3.0)
Method:	TRACI 2.1 Updated V1.07 / US 2008							Method:	TRACI 2.1 Updated V1.07 / US 2008									Method:	TRACI 2.1 Updated V1.07 / US 2008
Indicator:	Characterization							Indicator:	Characterization									Indicator:	Characterization
Skip categories:	Never							Skip categories:	Never									Skip categories:	Never
Exclude infrastructure processes:	No							Exclude infrastructure processes:	No									Exclude infrastructure processes:	No
Exclude long-term emissions:	No							Exclude long-term emissions:	No									Exclude long-term emissions:	No
Sorted on item:	Impact category							Sorted on item:	Impact category									Sorted on item:	Impact category
Sort order:	Ascending							Sort order:	Ascending									Sort order:	Ascending
Impact category	Unit	Total	DAC Construction Total - no PV	Methanol Production - Waste Heat - Grid	DAC EOL - no PV	Zeolite Life Cycle		Impact category	Unit	Total	Methanol Production - Waste Heat - Grid	Hydrogen Gas Production - Waste Heat - Grid	CO2 From DAC - Waste Heat - Grid	Copper-rich materials {GLO}| copper, anode to generic market for copper-rich materials | Cut-off, S	Electricity, medium voltage {US}| market group for | Cut-off, S	Wastewater, unpolluted {RoW}| market for wastewater, unpolluted | Cut-off, S		Impact category	Unit	Total	Hydrogen Gas Production - Waste Heat - Grid	Water, deionised {RoW}| market for water, deionised | Cut-off, S	Electricity, medium voltage {US}| market group for | Cut-off, S	Oxygen, liquid {RoW}| air separation, cryogenic | Cut-off, S	Wastewater, unpolluted {RoW}| market for wastewater, unpolluted | Cut-off, S
Ozone depletion	kg CFC-11 eq	4.40333e-07	5.42592e-08	3.84536e-07	1.11905e-11	1.52634e-09		Ozone depletion	kg CFC-11 eq	3.84536e-07	0	3.24657e-07	5.27093e-08	5.87438e-12	7.15258e-09	1.15706e-11		Ozone depletion	kg CFC-11 eq	3.24657e-07	0	5.20769e-10	3.88836e-07	-6.47041e-08	4.52728e-12
Global warming	kg CO2 eq	4.80408	0.787588	4.00933	3.36956e-05	0.00712792		Global warming	kg CO2 eq	4.00933	0.07264	4.51612	-0.700084	0.000108121	0.120358	0.000193295		Global warming	kg CO2 eq	4.51612	0	0.00107295	6.543	-2.02803	7.56312e-05
Smog	kg O3 eq	0.158154	0.0732284	0.084529	5.43624e-06	0.000390907		Smog	kg O3 eq	0.084529	0	0.0619946	0.0195477	2.41141e-05	0.00295111	1.15132e-05		Smog	kg O3 eq	0.0619946	0	5.76698e-05	0.160431	-0.0984989	4.50482e-06
Acidification	kg SO2 eq	0.0185779	0.00791556	0.0106305	2.20104e-07	3.15754e-05		Acidification	kg SO2 eq	0.0106305	0	0.00838176	0.00194494	9.69121e-06	0.000293415	6.91734e-07		Acidification	kg SO2 eq	0.00838176	0	7.01759e-06	0.0159509	-0.00757643	2.70657e-07
Eutrophication	kg N eq	0.0364749	0.00511454	0.0313324	1.86357e-07	2.77471e-05		Eutrophication	kg N eq	0.0313324	0	0.0281071	0.00259555	4.53745e-06	0.000624352	8.7095e-07		Eutrophication	kg N eq	0.0281071	0	3.59029e-06	0.0339417	-0.00583848	3.4078e-07
Carcinogenics	CTUh	1.40998e-06	1.04105e-06	3.66074e-07	2.11662e-12	2.85782e-09		Carcinogenics	CTUh	3.66074e-07	0	3.24409e-07	3.37261e-08	9.20478e-11	7.75036e-09	9.66484e-11		Carcinogenics	CTUh	3.24409e-07	0	1.74758e-10	4.21333e-07	-9.71373e-08	3.7816e-11
Non carcinogenics	CTUh	2.81528e-06	1.5972e-06	1.21335e-06	3.37324e-11	4.6973e-09		Non carcinogenics	CTUh	1.21335e-06	0	1.05856e-06	1.26756e-07	2.36753e-09	2.56018e-08	6.6493e-11		Non carcinogenics	CTUh	1.05856e-06	0	7.49745e-10	1.39179e-06	-3.34011e-07	2.60169e-11
Respiratory effects	kg PM2.5 eq	0.0123463	0.00158953	0.0107512	2.92029e-08	5.52923e-06		Respiratory effects	kg PM2.5 eq	0.0107512	0	0.00958848	0.000935705	9.97937e-07	0.000225779	2.1799e-07		Respiratory effects	kg PM2.5 eq	0.00958848	0	1.23054e-06	0.012274	-0.00268687	8.52936e-08
Ecotoxicity	CTUe	178.332	126.542	51.1072	0.363807	0.318554		Ecotoxicity	CTUe	51.1072	0	45.3907	4.49051	0.159676	1.06078	0.00548362		Ecotoxicity	CTUe	45.3907	0	0.0457981	57.6671	-12.3243	0.00214559
Fossil fuel depletion	MJ surplus	6.55818	0.624376	5.92709	0.000106419	0.00660588		Fossil fuel depletion	MJ surplus	5.92709	0	4.95074	0.862634	8.89274e-05	0.113456	0.000172612		Fossil fuel depletion	MJ surplus	4.95074	0	0.00107893	6.16782	-1.21823	6.75384e-05
Outputs:	Amount	Unit	Comments	Source
CO2 From DAC - Waste Heat - Grid	1	kg		Definition
Avoided Products:	Amount	Unit	Comments	Source
Inputs - Materials:	Amount	Unit	Comments	Source
Inputs - Electricity/Heat	Amount	Unit	Comments	Source
Electricity, medium voltage {US}| market group for | Cut-off, S	0.555	kWh	Blowers/other electrical	Simon 2023
Heat, from steam, in chemical industry {RoW}| market for heat, from steam, in chemical industry | Cut-off, S	1.55165	MJ	MW heat load	Exergy calculation
Emissions to Air	Amount	Unit	Comments	Source
Carbon dioxide	-1	kg		Definition
Assembly:	Amount	Units	Comments	Source
DAC Construction Total - no PV	1	p
Inputs:	Amount	Units	Comments	Source
Concrete block {RoW}| market for concrete block | Cut-off, S	260	ton
Steel, unalloyed {GLO}| market for | Cut-off, S	150000	kg
Aluminium, primary, ingot {IAI Area, North America}| market for aluminium, primary, ingot | Cut-off, S	64000	kg
Copper-rich materials {GLO}| market for copper-rich materials | Cut-off, S	500	kg
Stone wool {GLO}| market for stone wool | Cut-off, S	400	kg
Adhesive, for metal {RoW}| market for adhesive, for metal | Cut-off, S	80	kg
Alkyd paint, white, without solvent, in 60% solution state {RoW}| market for alkyd paint, white, without solvent, in 60% solution state | Cut-off, S	100	kg
Polyurethane, flexible foam {RoW}| market for polyurethane, flexible foam | Cut-off, S	100	kg
Calciner	1	p
Fan	6	p
Pellet Reactor	1	p
Slaker	1	p
Methanol factory {GLO}| market for | Cut-off, S	0.973311	p	Scaled down to production rate of CO2
Processes:	Amount	Units	Comments	Source
Machine operation, diesel, < 18.64 kW, low load factor {GLO}| market for | Cut-off, S	500	hr	Construction equipment
Assembly:
Zeolite 13X Manufacturing
Materials:	Amount	Unit	Comments	Source
Zeolite, powder {GLO}| market for | Cut-off, S	1	g		Gonzalez-Olmos
Outputs:	Amount	Units	Comments	Source
Hydrogen Gas Production - Waste Heat - Grid	104	kg
Avoided Products:	Amount	Units	Comments	Source
Oxygen, liquid {RoW}| market for | Cut-off, S	821	kg		Aspen Model
Inputs - Materials:	Amount	Units	Comments	Source
Water, deionised {RoW}| market for water, deionised | Cut-off, S	1037	kg		Aspen Model
Inputs - Electricity/Heat:	Amount	Unit	Comments	Source
Electricity, medium voltage {US}| market group for | Cut-off, S	5906	kWh	Total electrical demand	Aspen Model
Emissions To Air:	Amount	Unit	Comments	Source
Carbon dioxide	0	kg		Aspen Model
Outputs: Waste	Amount	Unit	Comments	Source
Wastewater, unpolluted {RoW}| market for wastewater, unpolluted | Cut-off, S	0.1103	m3		Aspen Model
Outputs:	Amount	Units	Comments	Source
Methanol Production - Waste Heat - Grid	500	kg
Inputs - Materials:	Amount	Units	Comments	Source
Hydrogen Gas Production - Waste Heat - Grid	104	kg		Aspen Model
CO2 From DAC - Waste Heat - Grid	723	kg		Aspen Model
Copper-rich materials {GLO}| copper, anode to generic market for copper-rich materials | Cut-off, S	8.3447	g	Catalyst	Sollai 2023
Inputs - Electricity/Heat:	Amount	Unit	Comments	Source
Electricity, medium voltage {US}| market group for | Cut-off, S	108.64	kWh	Total electrical demand	Aspen Model
Emissions To Air:	Amount	Unit	Comments	Source
Carbon dioxide	36.32	kg		Aspen Model
Hydrogen	9.64	kg		Aspen Model
Outputs: Waste and Emissions:	Amount	Unit	Comments	Source
Wastewater, unpolluted {RoW}| market for wastewater, unpolluted | Cut-off, S	0.2819	m3
Life Cycle:	Amount	Unit	Comments	Source
Zeolite Life Cycle	1	p
Assembly:
Zeolite 13X Manufacturing	1	p
Waste/Disposal Scenario:
Zeolite 13X Sorbent EOL
Disposal Scenario:	Amount	Unit	Comments	Source
Zeolite 13X Sorbent EOL	1	p
Referring to Assembly:
Zeolite 13X Manufacturing
Waste Scenarios:	Percentage:		Comments	Source
Municipal solid waste (waste scenario) {RoW}| Treatment of municipal solid waste, landfill | Cut-off, S	1			Gonzalez-Olmos
Disposal Scenario:	Amount	Unit	Comments	Source
DAC EOL - no PV	1	p
Referring to Assembly:
DAC Construction Total - no PV
Waste Scenarios:	Percentage:		Comments	Source
DAC EOL	1
Waste Scenario:	Amount	Unit	Comments	Source
DAC EOL	1	kg
Materials and/or Waste Types:	Material/Waste Type	Percentage
Aluminium (waste treatment) {GLO}| recycling of aluminium | Cut-off, S	Aluminium	1
Steel and iron (waste treatment) {GLO}| recycling of steel and iron | Cut-off, S	Steel	1
Scrap copper {RoW}| treatment of, municipal incineration | Cut-off, S	Coppers	1
Waste concrete {RoW}| treatment of, inert material landfill | Cut-off, S	Cement	1
Waste Streams Remaining After Separation:	Percentage
Municipal solid waste (waste scenario) {RoW}| Treatment of municipal solid waste, landfill | Cut-off, S	1
Life Cycle:	Amount	Unit	Comments	Source
LCA per kg - Waste Heat - Grid	1	p
Assembly:
DAC Construction Total - no PV	1.90263e-08	p
Processes:	Amount	Unit	Comments	Source
Methanol Production - Waste Heat - Grid	1	kg
Waste/Disposal Scenario:			Comments	Source
DAC EOL - no PV
Additional Life Cycles:	Amount	Unit	Comments	Source
Zeolite Life Cycle	1.13945			Gonzalez-Olmos 2022

## Sheet: Grid+MW+Geo
SimaPro 9.5.0.0	Impact assessment	Date:	2023-10-25	Time:	19:17:08.026000
Project	Nick - Global Thermostat LCA - Methanol
Calculation:	Analyze
Results:	Impact assessment
Product:	1 p Geological Storage - MW (of project Nick - Global Thermostat LCA - Methanol)
Method:	TRACI 2.1 Updated V1.07 / US 2008
Indicator:	Characterization
Skip categories:	Never
Exclude infrastructure processes:	No
Exclude long-term emissions:	No
Sorted on item:	Impact category
Sort order:	Ascending
Impact category	Unit	Total	DAC Construction Total - no PV	Geological Storage - MW	DAC EOL - no PV	Zeolite Life Cycle
Ozone depletion	kg CFC-11 eq	4.09273e-07	6.08881e-08	3.4795e-07	1.43241e-11	4.20452e-10
Global warming	kg CO2 eq	5.47725	0.879871	4.59553	3.64287e-05	0.00181008
Smog	kg O3 eq	0.21991	0.082634	0.137177	6.94575e-06	9.14943e-05
Acidification	kg SO2 eq	0.0225488	0.00893443	0.0136068	2.80399e-07	7.25761e-06
Eutrophication	kg N eq	0.0347189	0.00578611	0.0289268	1.15523e-07	5.8552e-06
Carcinogenics	CTUh	1.54102e-06	1.18084e-06	3.59392e-07	2.35594e-12	7.81828e-10
Non carcinogenics	CTUh	3.00927e-06	1.82173e-06	1.18619e-06	1.39418e-11	1.33595e-09
Respiratory effects	kg PM2.5 eq	0.0122569	0.00179486	0.0104605	3.7076e-08	1.4306e-06
Ecotoxicity	CTUe	193.725	144.375	49.1556	0.100683	0.0940186
Fossil fuel depletion	MJ surplus	5.97674	0.702467	5.27306	0.000136138	0.00107784
Outputs:	Amount	Unit	Comments	Source
CO2 From DAC - HTHP	1	kg		Definition
Avoided Products:	Amount	Unit	Comments	Source
Inputs - Materials:	Amount	Unit	Comments	Source
Inputs - Electricity/Heat	Amount	Unit	Comments	Source
Electricity, medium voltage {US}| market group for | Cut-off, S	0.26	kWh	Blowers/other electrical	Ping 2018
Electricity, medium voltage {US}| market group for | Cut-off, S	34.9	MJ	MW heat load, 29.7 MJ/kg with 85% efficiency	Experimental data
Emissions to Air	Amount	Unit	Comments	Source
Carbon dioxide	-1	kg		Definition
Assembly:	Amount	Units	Comments	Source
DAC Construction Total - no PV	1	p
Inputs:	Amount	Units	Comments	Source
Concrete block {RoW}| market for concrete block | Cut-off, S	120	ton		Madhu 2021
Steel, unalloyed {GLO}| market for | Cut-off, S	1000	kg
Aluminium, primary, ingot {IAI Area, North America}| market for aluminium, primary, ingot | Cut-off, S	100	kg
Copper-rich materials {GLO}| market for copper-rich materials | Cut-off, S	50	kg
Stone wool {GLO}| market for stone wool | Cut-off, S	10	kg
Adhesive, for metal {RoW}| market for adhesive, for metal | Cut-off, S	2	kg
Alkyd paint, white, without solvent, in 60% solution state {RoW}| market for alkyd paint, white, without solvent, in 60% solution state | Cut-off, S	25	kg
Polyurethane, flexible foam {RoW}| market for polyurethane, flexible foam | Cut-off, S	25	kg
Calciner	1	p
Fan	6	p
Pellet Reactor	1	p
Slaker	1	p
Cordierite	1000	kg
Methanol factory {GLO}| construction | Cut-off, S	0.403	p	Scaled down to production rate of CO2
Processes:	Amount	Units	Comments	Source
Machine operation, diesel, < 18.64 kW, low load factor {GLO}| market for | Cut-off, S	1000	hr	Construction equipment
Outputs:	Amount	Units	Comments	Source
Zeolite A	1	kton		Grimaldi 2021
Inputs - Materials:	Amount	Units	Comments	Source
Aluminium hydroxide {GLO}| market for | Cut-off, S	526	ton	Chemicals	Grimaldi 2021
Silica sand {GLO}| market for | Cut-off, S	1501	ton	Chemicals	Grimaldi 2021
Sodium hydroxide, without water, in 50% solution state {GLO}| market for | Cut-off, S	278	ton	Chemicals	Grimaldi 2021
Water, deionised {RoW}| market for water, deionised | Cut-off, S	2960	ton	Chemicals	Grimaldi 2021
Water, deionised {RoW}| market for water, deionised | Cut-off, S	30171	ton	Cleaning	Grimaldi 2021
Sodium hydroxide, without water, in 50% solution state {GLO}| market for | Cut-off, S	280	ton	Cleaning	Grimaldi 2021
Inputs - Electricity/Heat	Amount	Unit	Comments	Source
Heat, from steam, in chemical industry {RoW}| market for heat, from steam, in chemical industry | Cut-off, S	372	MWh	Heating	Grimaldi 2021
Electricity, medium voltage {US}| market group for | Cut-off, S	93	MWh	Pumping	Grimaldi 2021
Electricity, medium voltage {US}| market group for | Cut-off, S	55	MWh	Mixing	Grimaldi 2021
Outputs - Waste:	Amount	Unit	Comments	Source
Wastewater, average {RoW}| market for wastewater, average | Cut-off, S	21793	m3		Grimaldi 2021
Assembly:
Zeolilte Manufacturing per kg CO2
Materials:	Amount	Unit	Comments	Source
Zeolite A	1	g		Definition
Outputs:	Amount	Units	Comments	Source
Geological Storage - MW	1	kg
Inputs - Materials:	Amount	Units	Comments	Source
CO2 From DAC - MW	1	kg
Transport, pipeline, onshore, long distance, natural gas {RoW}| market for transport, pipeline, onshore, long distance, natural gas | Cut-off, S	100	kgkm
Inputs - Electricity/Heat	Amount	Unit	Comments	Source
Electricity, medium voltage {US}| market group for | Cut-off, S	0.1116	kWh	Compressed to 15 Mpa
Life Cycle:	Amount	Unit	Comments	Source
Zeolite Life Cycle	1	p
Assembly:
Zeolite Manufacturing per kg CO2	1	p
Waste/Disposal Scenario:
Zeolite Sorbent EOL
Disposal Scenario:	Amount	Unit	Comments	Source
Zeolite Sorbent EOL	1	p
Referring to Assembly:
Zeolite Manufacturing per kg CO2
Waste Scenarios:	Percentage:		Comments	Source
Municipal solid waste (waste scenario) {RoW}| Treatment of municipal solid waste, incineration | Cut-off, S	1			Grimaldi 2021
Disposal Scenario:	Amount	Unit	Comments	Source
DAC EOL - no PV	1	p
Referring to Assembly:
DAC Construction Total - no PV
Waste Scenarios:	Percentage:		Comments	Source
DAC EOL	1
Waste Scenario:	Amount	Unit	Comments	Source
DAC EOL	1	kg
Materials and/or Waste Types:	Material/Waste Type	Percentage
Aluminium (waste treatment) {GLO}| recycling of aluminium | Cut-off, S	Aluminium	1
Steel and iron (waste treatment) {GLO}| recycling of steel and iron | Cut-off, S	Steel	1
Scrap copper {RoW}| treatment of, municipal incineration | Cut-off, S	Coppers	1
Waste concrete {RoW}| treatment of, inert material landfill | Cut-off, S	Cement	1
Waste Streams Remaining After Separation:	Percentage
Municipal solid waste (waste scenario) {RoW}| Treatment of municipal solid waste, landfill | Cut-off, S	1
Life Cycle:	Amount	Unit	Comments	Source
Geological Storage - MW	1	p
Assembly:
DAC Construction Total - no PV	5.263e-08	p	1 kt * 20 yrs * 0.95
Processes:	Amount	Unit	Comments	Source
Geological Storage - MW	1	kg
Waste/Disposal Scenario:			Comments	Source
DAC EOL - no PV
Additional Life Cycles:	Amount	Unit	Comments	Source
Zeolite Life Cycle	0.788			Gonzalez-Olmos 2022

## Sheet: Grid+HTHP+Geo
SimaPro 9.5.0.0	Impact assessment	Date:	2023-10-25	Time:	19:16:44.596000
Project	Nick - Global Thermostat LCA - Methanol
Calculation:	Analyze
Results:	Impact assessment
Product:	1 p Geological Storage - HTHP (of project Nick - Global Thermostat LCA - Methanol)
Method:	TRACI 2.1 Updated V1.07 / US 2008
Indicator:	Characterization
Skip categories:	Never
Exclude infrastructure processes:	No
Exclude long-term emissions:	No
Sorted on item:	Impact category
Sort order:	Ascending
Impact category	Unit	Total	DAC Construction Total - no PV	Geological Storage - HTHP	DAC EOL - no PV	Zeolite Life Cycle
Ozone depletion	kg CFC-11 eq	1.65583e-07	6.08881e-08	1.0426e-07	1.43241e-11	4.20452e-10
Global warming	kg CO2 eq	1.37664	0.879871	0.494923	3.64287e-05	0.00181008
Smog	kg O3 eq	0.119365	0.082634	0.0366321	6.94575e-06	9.14943e-05
Acidification	kg SO2 eq	0.0125521	0.00893443	0.00361011	2.80399e-07	7.25761e-06
Eutrophication	kg N eq	0.0134471	0.00578611	0.00765502	1.15523e-07	5.8552e-06
Carcinogenics	CTUh	1.27696e-06	1.18084e-06	9.53358e-08	2.35594e-12	7.81828e-10
Non carcinogenics	CTUh	2.13701e-06	1.82173e-06	3.13931e-07	1.39418e-11	1.33595e-09
Respiratory effects	kg PM2.5 eq	0.00456451	0.00179486	0.00276819	3.7076e-08	1.4306e-06
Ecotoxicity	CTUe	157.584	144.375	13.0147	0.100683	0.0940186
Fossil fuel depletion	MJ surplus	2.11126	0.702467	1.40758	0.000136138	0.00107784
Outputs:	Amount	Unit	Comments	Source
CO2 From DAC - HTHP	1	kg		Definition
Avoided Products:	Amount	Unit	Comments	Source
Inputs - Materials:	Amount	Unit	Comments	Source
Inputs - Electricity/Heat	Amount	Unit	Comments	Source
Electricity, medium voltage {US}| market group for | Cut-off, S	0.26	kWh	Blowers/other electrical	Ping 2018
Electricity, medium voltage {US}| market group for | Cut-off, S	8.25	MJ	Heat pump heat, 100% of load, 29.7 MJ/kg, 3.6 COP	Experimental data
Emissions to Air	Amount	Unit	Comments	Source
Carbon dioxide	-1	kg		Definition
Assembly:	Amount	Units	Comments	Source
DAC Construction Total - no PV	1	p
Inputs:	Amount	Units	Comments	Source
Concrete block {RoW}| market for concrete block | Cut-off, S	120	ton		Madhu 2021
Steel, unalloyed {GLO}| market for | Cut-off, S	1000	kg
Aluminium, primary, ingot {IAI Area, North America}| market for aluminium, primary, ingot | Cut-off, S	100	kg
Copper-rich materials {GLO}| market for copper-rich materials | Cut-off, S	50	kg
Stone wool {GLO}| market for stone wool | Cut-off, S	10	kg
Adhesive, for metal {RoW}| market for adhesive, for metal | Cut-off, S	2	kg
Alkyd paint, white, without solvent, in 60% solution state {RoW}| market for alkyd paint, white, without solvent, in 60% solution state | Cut-off, S	25	kg
Polyurethane, flexible foam {RoW}| market for polyurethane, flexible foam | Cut-off, S	25	kg
Calciner	1	p
Fan	6	p
Pellet Reactor	1	p
Slaker	1	p
Cordierite	1000	kg
Methanol factory {GLO}| construction | Cut-off, S	0.403	p	Scaled down to production rate of CO2
Processes:	Amount	Units	Comments	Source
Machine operation, diesel, < 18.64 kW, low load factor {GLO}| market for | Cut-off, S	1000	hr	Construction equipment
Outputs:	Amount	Units	Comments	Source
Zeolite A	1	kton		Grimaldi 2021
Inputs - Materials:	Amount	Units	Comments	Source
Aluminium hydroxide {GLO}| market for | Cut-off, S	526	ton	Chemicals	Grimaldi 2021
Silica sand {GLO}| market for | Cut-off, S	1501	ton	Chemicals	Grimaldi 2021
Sodium hydroxide, without water, in 50% solution state {GLO}| market for | Cut-off, S	278	ton	Chemicals	Grimaldi 2021
Water, deionised {RoW}| market for water, deionised | Cut-off, S	2960	ton	Chemicals	Grimaldi 2021
Water, deionised {RoW}| market for water, deionised | Cut-off, S	30171	ton	Cleaning	Grimaldi 2021
Sodium hydroxide, without water, in 50% solution state {GLO}| market for | Cut-off, S	280	ton	Cleaning	Grimaldi 2021
Inputs - Electricity/Heat	Amount	Unit	Comments	Source
Heat, from steam, in chemical industry {RoW}| market for heat, from steam, in chemical industry | Cut-off, S	372	MWh	Heating	Grimaldi 2021
Electricity, medium voltage {US}| market group for | Cut-off, S	93	MWh	Pumping	Grimaldi 2021
Electricity, medium voltage {US}| market group for | Cut-off, S	55	MWh	Mixing	Grimaldi 2021
Outputs - Waste:	Amount	Unit	Comments	Source
Wastewater, average {RoW}| market for wastewater, average | Cut-off, S	21793	m3		Grimaldi 2021
Assembly:
Zeolilte Manufacturing per kg CO2
Materials:	Amount	Unit	Comments	Source
Zeolite A	1	g		Definition
Outputs:	Amount	Units	Comments	Source
Geological Storage - HTHP	1	kg
Inputs - Materials:	Amount	Units	Comments	Source
CO2 From DAC - HTHP	1	kg
Transport, pipeline, onshore, long distance, natural gas {RoW}| market for transport, pipeline, onshore, long distance, natural gas | Cut-off, S	100	kgkm
Inputs - Electricity/Heat	Amount	Unit	Comments	Source
Electricity, medium voltage {US}| market group for | Cut-off, S	0.1116	kWh	Compressed to 15 Mpa
Life Cycle:	Amount	Unit	Comments	Source
Zeolite Life Cycle	1	p
Assembly:
Zeolite Manufacturing per kg CO2	1	p
Waste/Disposal Scenario:
Zeolite Sorbent EOL
Disposal Scenario:	Amount	Unit	Comments	Source
Zeolite Sorbent EOL	1	p
Referring to Assembly:
Zeolite Manufacturing per kg CO2
Waste Scenarios:	Percentage:		Comments	Source
Municipal solid waste (waste scenario) {RoW}| Treatment of municipal solid waste, incineration | Cut-off, S	1			Grimaldi 2021
Disposal Scenario:	Amount	Unit	Comments	Source
DAC EOL - no PV	1	p
Referring to Assembly:
DAC Construction Total - no PV
Waste Scenarios:	Percentage:		Comments	Source
DAC EOL	1
Waste Scenario:	Amount	Unit	Comments	Source
DAC EOL	1	kg
Materials and/or Waste Types:	Material/Waste Type	Percentage
Aluminium (waste treatment) {GLO}| recycling of aluminium | Cut-off, S	Aluminium	1
Steel and iron (waste treatment) {GLO}| recycling of steel and iron | Cut-off, S	Steel	1
Scrap copper {RoW}| treatment of, municipal incineration | Cut-off, S	Coppers	1
Waste concrete {RoW}| treatment of, inert material landfill | Cut-off, S	Cement	1
Waste Streams Remaining After Separation:	Percentage
Municipal solid waste (waste scenario) {RoW}| Treatment of municipal solid waste, landfill | Cut-off, S	1
Life Cycle:	Amount	Unit	Comments	Source
Geological Storage - HTHP	1	p
Assembly:
DAC Construction Total - no PV	5.263e-08	p	1 kt * 20 yrs * 0.95
Processes:	Amount	Unit	Comments	Source
Geological Storage - HTHP	1	kg
Waste/Disposal Scenario:			Comments	Source
DAC EOL - no PV
Additional Life Cycles:	Amount	Unit	Comments	Source
Zeolite Life Cycle	0.788			Gonzalez-Olmos 2022

## Sheet: Grid+Gas+Geo
SimaPro 9.5.0.0	Impact assessment	Date:	2023-10-25	Time:	19:16:21.736000
Project	Nick - Global Thermostat LCA - Methanol
Calculation:	Analyze
Results:	Impact assessment
Product:	1 p Geological Storage - Gas (of project Nick - Global Thermostat LCA - Methanol)
Method:	TRACI 2.1 Updated V1.07 / US 2008
Indicator:	Characterization
Skip categories:	Never
Exclude infrastructure processes:	No
Exclude long-term emissions:	No
Sorted on item:	Impact category
Sort order:	Ascending
Impact category	Unit	Total	DAC Construction Total - no PV	Geological Storage - Gas	DAC EOL - no PV	Zeolite Life Cycle
Ozone depletion	kg CFC-11 eq	4.38163e-07	6.08881e-08	3.7684e-07	1.43241e-11	4.20452e-10
Global warming	kg CO2 eq	4.09653	0.879871	3.21481	3.64287e-05	0.00181008
Smog	kg O3 eq	0.202709	0.082634	0.119977	6.94575e-06	9.14943e-05
Acidification	kg SO2 eq	0.0208573	0.00893443	0.0119153	2.80399e-07	7.25761e-06
Eutrophication	kg N eq	0.010694	0.00578611	0.00490196	1.15523e-07	5.8552e-06
Carcinogenics	CTUh	1.26273e-06	1.18084e-06	8.1101e-08	2.35594e-12	7.81828e-10
Non carcinogenics	CTUh	2.29315e-06	1.82173e-06	4.70071e-07	1.39418e-11	1.33595e-09
Respiratory effects	kg PM2.5 eq	0.00353052	0.00179486	0.0017342	3.7076e-08	1.4306e-06
Ecotoxicity	CTUe	153.975	144.375	9.40482	0.100683	0.0940186
Fossil fuel depletion	MJ surplus	6.78637	0.702467	6.08269	0.000136138	0.00107784
Outputs:	Amount	Unit	Comments	Source
CO2 From DAC - Gas	1	kg		Definition
Avoided Products:	Amount	Unit	Comments	Source
Inputs - Materials:	Amount	Unit	Comments	Source
Inputs - Electricity/Heat	Amount	Unit	Comments	Source
Electricity, medium voltage {US}| market group for | Cut-off, S	0.26	kWh	Blowers/other electrical	Ping 2018
Heat, from steam, in chemical industry {RoW}| market for heat, from steam, in chemical industry | Cut-off, S	29.7	MJ	"Average fuel mix"	Experimental data
Emissions to Air	Amount	Unit	Comments	Source
Carbon dioxide	-1	kg		Definition
Assembly:	Amount	Units	Comments	Source
DAC Construction Total - no PV	1	p
Inputs:	Amount	Units	Comments	Source
Concrete block {RoW}| market for concrete block | Cut-off, S	120	ton		Madhu 2021
Steel, unalloyed {GLO}| market for | Cut-off, S	1000	kg
Aluminium, primary, ingot {IAI Area, North America}| market for aluminium, primary, ingot | Cut-off, S	100	kg
Copper-rich materials {GLO}| market for copper-rich materials | Cut-off, S	50	kg
Stone wool {GLO}| market for stone wool | Cut-off, S	10	kg
Adhesive, for metal {RoW}| market for adhesive, for metal | Cut-off, S	2	kg
Alkyd paint, white, without solvent, in 60% solution state {RoW}| market for alkyd paint, white, without solvent, in 60% solution state | Cut-off, S	25	kg
Polyurethane, flexible foam {RoW}| market for polyurethane, flexible foam | Cut-off, S	25	kg
Calciner	1	p
Fan	6	p
Pellet Reactor	1	p
Slaker	1	p
Cordierite	1000	kg
Methanol factory {GLO}| construction | Cut-off, S	0.403	p	Scaled down to production rate of CO2
Processes:	Amount	Units	Comments	Source
Machine operation, diesel, < 18.64 kW, low load factor {GLO}| market for | Cut-off, S	1000	hr	Construction equipment
Outputs:	Amount	Units	Comments	Source
Zeolite A	1	kton		Grimaldi 2021
Inputs - Materials:	Amount	Units	Comments	Source
Aluminium hydroxide {GLO}| market for | Cut-off, S	526	ton	Chemicals	Grimaldi 2021
Silica sand {GLO}| market for | Cut-off, S	1501	ton	Chemicals	Grimaldi 2021
Sodium hydroxide, without water, in 50% solution state {GLO}| market for | Cut-off, S	278	ton	Chemicals	Grimaldi 2021
Water, deionised {RoW}| market for water, deionised | Cut-off, S	2960	ton	Chemicals	Grimaldi 2021
Water, deionised {RoW}| market for water, deionised | Cut-off, S	30171	ton	Cleaning	Grimaldi 2021
Sodium hydroxide, without water, in 50% solution state {GLO}| market for | Cut-off, S	280	ton	Cleaning	Grimaldi 2021
Inputs - Electricity/Heat	Amount	Unit	Comments	Source
Heat, from steam, in chemical industry {RoW}| market for heat, from steam, in chemical industry | Cut-off, S	372	MWh	Heating	Grimaldi 2021
Electricity, medium voltage {US}| market group for | Cut-off, S	93	MWh	Pumping	Grimaldi 2021
Electricity, medium voltage {US}| market group for | Cut-off, S	55	MWh	Mixing	Grimaldi 2021
Outputs - Waste:	Amount	Unit	Comments	Source
Wastewater, average {RoW}| market for wastewater, average | Cut-off, S	21793	m3		Grimaldi 2021
Assembly:
Zeolilte Manufacturing per kg CO2
Materials:	Amount	Unit	Comments	Source
Zeolite A	1	g		Definition
Outputs:	Amount	Units	Comments	Source
Geological Storage - Gas	1	kg
Inputs - Materials:	Amount	Units	Comments	Source
CO2 From DAC - HTHP	1	kg
Transport, pipeline, onshore, long distance, natural gas {RoW}| market for transport, pipeline, onshore, long distance, natural gas | Cut-off, S	100	kgkm
Inputs - Electricity/Heat	Amount	Unit	Comments	Source
Electricity, medium voltage {US}| market group for | Cut-off, S	0.1116	kWh	Compressed to 15 Mpa
Life Cycle:	Amount	Unit	Comments	Source
Zeolite Life Cycle	1	p
Assembly:
Zeolite Manufacturing per kg CO2	1	p
Waste/Disposal Scenario:
Zeolite Sorbent EOL
Disposal Scenario:	Amount	Unit	Comments	Source
Zeolite Sorbent EOL	1	p
Referring to Assembly:
Zeolite Manufacturing per kg CO2
Waste Scenarios:	Percentage:		Comments	Source
Municipal solid waste (waste scenario) {RoW}| Treatment of municipal solid waste, incineration | Cut-off, S	1			Grimaldi 2021
Disposal Scenario:	Amount	Unit	Comments	Source
DAC EOL - no PV	1	p
Referring to Assembly:
DAC Construction Total - no PV
Waste Scenarios:	Percentage:		Comments	Source
DAC EOL	1
Waste Scenario:	Amount	Unit	Comments	Source
DAC EOL	1	kg
Materials and/or Waste Types:	Material/Waste Type	Percentage
Aluminium (waste treatment) {GLO}| recycling of aluminium | Cut-off, S	Aluminium	1
Steel and iron (waste treatment) {GLO}| recycling of steel and iron | Cut-off, S	Steel	1
Scrap copper {RoW}| treatment of, municipal incineration | Cut-off, S	Coppers	1
Waste concrete {RoW}| treatment of, inert material landfill | Cut-off, S	Cement	1
Waste Streams Remaining After Separation:	Percentage
Municipal solid waste (waste scenario) {RoW}| Treatment of municipal solid waste, landfill | Cut-off, S	1
Life Cycle:	Amount	Unit	Comments	Source
Geological Storage - Gas	1	p
Assembly:
DAC Construction Total - no PV	5.263e-08	p	1 kt * 20 yrs * 0.95
Processes:	Amount	Unit	Comments	Source
Geological Storage - Gas	1	kg
Waste/Disposal Scenario:			Comments	Source
DAC EOL - no PV
Additional Life Cycles:	Amount	Unit	Comments	Source
Zeolite Life Cycle	0.788			Gonzalez-Olmos 2022

## Sheet: Grid+Waste Heat+Geo
SimaPro 9.5.0.0	Impact assessment	Date:	2023-10-25	Time:	19:17:30.379000
Project	Nick - Global Thermostat LCA - Methanol
Calculation:	Analyze
Results:	Impact assessment
Product:	1 p Geological Storage - Waste Heat (of project Nick - Global Thermostat LCA - Methanol)
Method:	TRACI 2.1 Updated V1.07 / US 2008
Indicator:	Characterization
Skip categories:	Never
Exclude infrastructure processes:	No
Exclude long-term emissions:	No
Sorted on item:	Impact category
Sort order:	Ascending
Impact category	Unit	Total	DAC Construction Total - no PV	Geological Storage - Waste Heat	DAC EOL - no PV	Zeolite Life Cycle
Ozone depletion	kg CFC-11 eq	9.01444e-08	6.08881e-08	2.88216e-08	1.43241e-11	4.20452e-10
Global warming	kg CO2 eq	0.107222	0.879871	-0.774496	3.64287e-05	0.00181008
Smog	kg O3 eq	0.088239	0.082634	0.00550656	6.94575e-06	9.14943e-05
Acidification	kg SO2 eq	0.00945741	0.00893443	0.000515447	2.80399e-07	7.25761e-06
Eutrophication	kg N eq	0.00686201	0.00578611	0.00106993	1.15523e-07	5.8552e-06
Carcinogenics	CTUh	1.19522e-06	1.18084e-06	1.35922e-08	2.35594e-12	7.81828e-10
Non carcinogenics	CTUh	1.86699e-06	1.82173e-06	4.39063e-08	1.39418e-11	1.33595e-09
Respiratory effects	kg PM2.5 eq	0.00218321	0.00179486	0.000386882	3.7076e-08	1.4306e-06
Ecotoxicity	CTUe	146.396	144.375	1.82657	0.100683	0.0940186
Fossil fuel depletion	MJ surplus	0.914631	0.702467	0.21095	0.000136138	0.00107784
Outputs:	Amount	Unit	Comments	Source
CO2 From DAC - Waste Heat	1	kg		Definition
Avoided Products:	Amount	Unit	Comments	Source
Inputs - Materials:	Amount	Unit	Comments	Source
Inputs - Electricity/Heat	Amount	Unit	Comments	Source
Electricity, medium voltage {US}| market group for | Cut-off, S	0.26	kWh	Blowers/other electrical	Ping 2018
Heat, from steam, in chemical industry {RoW}| market for heat, from steam, in chemical industry | Cut-off, S	0	MJ	29.7 MJ/kg burden free	Experimental data
Emissions to Air	Amount	Unit	Comments	Source
Carbon dioxide	-1	kg		Definition
Assembly:	Amount	Units	Comments	Source
DAC Construction Total - no PV	1	p
Inputs:	Amount	Units	Comments	Source
Concrete block {RoW}| market for concrete block | Cut-off, S	120	ton		Madhu 2021
Steel, unalloyed {GLO}| market for | Cut-off, S	1000	kg
Aluminium, primary, ingot {IAI Area, North America}| market for aluminium, primary, ingot | Cut-off, S	100	kg
Copper-rich materials {GLO}| market for copper-rich materials | Cut-off, S	50	kg
Stone wool {GLO}| market for stone wool | Cut-off, S	10	kg
Adhesive, for metal {RoW}| market for adhesive, for metal | Cut-off, S	2	kg
Alkyd paint, white, without solvent, in 60% solution state {RoW}| market for alkyd paint, white, without solvent, in 60% solution state | Cut-off, S	25	kg
Polyurethane, flexible foam {RoW}| market for polyurethane, flexible foam | Cut-off, S	25	kg
Calciner	1	p
Fan	6	p
Pellet Reactor	1	p
Slaker	1	p
Cordierite	1000	kg
Methanol factory {GLO}| construction | Cut-off, S	0.403	p	Scaled down to production rate of CO2
Processes:	Amount	Units	Comments	Source
Machine operation, diesel, < 18.64 kW, low load factor {GLO}| market for | Cut-off, S	1000	hr	Construction equipment
Outputs:	Amount	Units	Comments	Source
Zeolite A	1	kton		Grimaldi 2021
Inputs - Materials:	Amount	Units	Comments	Source
Aluminium hydroxide {GLO}| market for | Cut-off, S	526	ton	Chemicals	Grimaldi 2021
Silica sand {GLO}| market for | Cut-off, S	1501	ton	Chemicals	Grimaldi 2021
Sodium hydroxide, without water, in 50% solution state {GLO}| market for | Cut-off, S	278	ton	Chemicals	Grimaldi 2021
Water, deionised {RoW}| market for water, deionised | Cut-off, S	2960	ton	Chemicals	Grimaldi 2021
Water, deionised {RoW}| market for water, deionised | Cut-off, S	30171	ton	Cleaning	Grimaldi 2021
Sodium hydroxide, without water, in 50% solution state {GLO}| market for | Cut-off, S	280	ton	Cleaning	Grimaldi 2021
Inputs - Electricity/Heat	Amount	Unit	Comments	Source
Heat, from steam, in chemical industry {RoW}| market for heat, from steam, in chemical industry | Cut-off, S	372	MWh	Heating	Grimaldi 2021
Electricity, medium voltage {US}| market group for | Cut-off, S	93	MWh	Pumping	Grimaldi 2021
Electricity, medium voltage {US}| market group for | Cut-off, S	55	MWh	Mixing	Grimaldi 2021
Outputs - Waste:	Amount	Unit	Comments	Source
Wastewater, average {RoW}| market for wastewater, average | Cut-off, S	21793	m3		Grimaldi 2021
Assembly:
Zeolilte Manufacturing per kg CO2
Materials:	Amount	Unit	Comments	Source
Zeolite A	1	g		Definition
Outputs:	Amount	Units	Comments	Source
Geological Storage - Waste Heat	1	kg
Inputs - Materials:	Amount	Units	Comments	Source
CO2 From DAC - HTHP	1	kg
Transport, pipeline, onshore, long distance, natural gas {RoW}| market for transport, pipeline, onshore, long distance, natural gas | Cut-off, S	100	kgkm
Inputs - Electricity/Heat	Amount	Unit	Comments	Source
Electricity, medium voltage {US}| market group for | Cut-off, S	0.1116	kWh	Compressed to 15 Mpa
Life Cycle:	Amount	Unit	Comments	Source
Zeolite Life Cycle	1	p
Assembly:
Zeolite Manufacturing per kg CO2	1	p
Waste/Disposal Scenario:
Zeolite Sorbent EOL
Disposal Scenario:	Amount	Unit	Comments	Source
Zeolite Sorbent EOL	1	p
Referring to Assembly:
Zeolite Manufacturing per kg CO2
Waste Scenarios:	Percentage:		Comments	Source
Municipal solid waste (waste scenario) {RoW}| Treatment of municipal solid waste, incineration | Cut-off, S	1			Grimaldi 2021
Disposal Scenario:	Amount	Unit	Comments	Source
DAC EOL - no PV	1	p
Referring to Assembly:
DAC Construction Total - no PV
Waste Scenarios:	Percentage:		Comments	Source
DAC EOL	1
Waste Scenario:	Amount	Unit	Comments	Source
DAC EOL	1	kg
Materials and/or Waste Types:	Material/Waste Type	Percentage
Aluminium (waste treatment) {GLO}| recycling of aluminium | Cut-off, S	Aluminium	1
Steel and iron (waste treatment) {GLO}| recycling of steel and iron | Cut-off, S	Steel	1
Scrap copper {RoW}| treatment of, municipal incineration | Cut-off, S	Coppers	1
Waste concrete {RoW}| treatment of, inert material landfill | Cut-off, S	Cement	1
Waste Streams Remaining After Separation:	Percentage
Municipal solid waste (waste scenario) {RoW}| Treatment of municipal solid waste, landfill | Cut-off, S	1
Life Cycle:	Amount	Unit	Comments	Source
Geological Storage - Waste Heat	1	p
Assembly:
DAC Construction Total - no PV	5.263e-08	p	1 kt * 20 yrs * 0.95
Processes:	Amount	Unit	Comments	Source
Geological Storage - Waste Heat	1	kg
Waste/Disposal Scenario:			Comments	Source
DAC EOL - no PV
Additional Life Cycles:	Amount	Unit	Comments	Source
Zeolite Life Cycle	0.788			Gonzalez-Olmos 2022

## Sheet: PV+MW (AL)
Calculation:	Analyze							Calculation:	Analyze								Calculation:	Analyze
Results:	Impact assessment							Results:	Impact assessment								Results:	Impact assessment
Product:	1 p LCA per kg - MW - PV - AL (of project Nick - DAC + Methanol LCA kg Methanol 3.0)							Product:	1 kg Methanol Production - MW - PV (of project Nick - DAC + Methanol LCA kg Methanol 3.0)								Product:	0.208 kg Hydrogen Gas Production - MW - PV (of project Nick - DAC + Methanol LCA kg Methanol 3.0)
Method:	TRACI 2.1 Updated V1.07 / US 2008							Method:	TRACI 2.1 Updated V1.07 / US 2008								Method:	TRACI 2.1 Updated V1.07 / US 2008
Indicator:	Characterization							Indicator:	Characterization								Indicator:	Characterization
Skip categories:	Never							Skip categories:	Never								Skip categories:	Never
Exclude infrastructure processes:	No							Exclude infrastructure processes:	No								Exclude infrastructure processes:	No
Exclude long-term emissions:	No							Exclude long-term emissions:	No								Exclude long-term emissions:	No
Sorted on item:	Impact category							Sorted on item:	Impact category								Sorted on item:	Impact category
Sort order:	Ascending							Sort order:	Ascending								Sort order:	Ascending
Impact category	Unit	Total	DAC Construction Total - PV, MW, AL	Methanol Production - MW - PV	DAC EOL - Full PV, MW, Tuscaloosa	Zeolite Life Cycle		Impact category	Unit	Total	Methanol Production - MW - PV	Hydrogen Gas Production - MW - PV	CO2 From DAC - MW - PV	Copper-rich materials {GLO}| copper, anode to generic market for copper-rich materials | Cut-off, S	Wastewater, unpolluted {RoW}| market for wastewater, unpolluted | Cut-off, S		Impact category	Unit	Total	Hydrogen Gas Production - MW - PV	Water, deionised {RoW}| market for water, deionised | Cut-off, S	Oxygen, liquid {RoW}| air separation, cryogenic | Cut-off, S	Wastewater, unpolluted {RoW}| market for wastewater, unpolluted | Cut-off, S
Ozone depletion	kg CFC-11 eq	1.26815e-07	1.89439e-07	-6.41613e-08	1.11905e-11	1.52634e-09		Ozone depletion	kg CFC-11 eq	-6.41613e-08	0	-6.41788e-08	0	5.87438e-12	1.15706e-11		Ozone depletion	kg CFC-11 eq	-6.41788e-08	0	5.20769e-10	-6.47041e-08	4.52728e-12
Global warming	kg CO2 eq	-1.35748	2.0353	-3.39994	3.36956e-05	0.00712792		Global warming	kg CO2 eq	-3.39994	0.07264	-2.02688	-1.446	0.000108121	0.000193295		Global warming	kg CO2 eq	-2.02688	0	0.00107295	-2.02803	7.56312e-05
Smog	kg O3 eq	0.04261	0.140615	-0.0984011	5.43624e-06	0.000390907		Smog	kg O3 eq	-0.0984011	0	-0.0984367	0	2.41141e-05	1.15132e-05		Smog	kg O3 eq	-0.0984367	0	5.76698e-05	-0.0984989	4.50482e-06
Acidification	kg SO2 eq	0.00649927	0.0140262	-0.00755876	2.20104e-07	3.15754e-05		Acidification	kg SO2 eq	-0.00755876	0	-0.00756914	0	9.69121e-06	6.91734e-07		Acidification	kg SO2 eq	-0.00756914	0	7.01759e-06	-0.00757643	2.70657e-07
Eutrophication	kg N eq	0.00414364	0.00994484	-0.00582914	1.86357e-07	2.77471e-05		Eutrophication	kg N eq	-0.00582914	0	-0.00583455	0	4.53745e-06	8.7095e-07		Eutrophication	kg N eq	-0.00583455	0	3.59029e-06	-0.00583848	3.4078e-07
Carcinogenics	CTUh	1.22154e-06	1.31542e-06	-9.6736e-08	2.11662e-12	2.85782e-09		Carcinogenics	CTUh	-9.6736e-08	0	-9.69247e-08	0	9.20478e-11	9.66484e-11		Carcinogenics	CTUh	-9.69247e-08	0	1.74758e-10	-9.71373e-08	3.7816e-11
Non carcinogenics	CTUh	2.00255e-06	2.32862e-06	-3.30801e-07	3.37324e-11	4.6973e-09		Non carcinogenics	CTUh	-3.30801e-07	0	-3.33235e-07	0	2.36753e-09	6.6493e-11		Non carcinogenics	CTUh	-3.33235e-07	0	7.49745e-10	-3.34011e-07	2.60169e-11
Respiratory effects	kg PM2.5 eq	0.000268621	0.0029474	-0.00268434	2.92029e-08	5.52923e-06		Respiratory effects	kg PM2.5 eq	-0.00268434	0	-0.00268555	0	9.97937e-07	2.1799e-07		Respiratory effects	kg PM2.5 eq	-0.00268555	0	1.23054e-06	-0.00268687	8.52936e-08
Ecotoxicity	CTUe	198.771	210.2	-12.1112	0.363807	0.318554		Ecotoxicity	CTUe	-12.1112	0	-12.2763	0	0.159676	0.00548362		Ecotoxicity	CTUe	-12.2763	0	0.0457981	-12.3243	0.00214559
Fossil fuel depletion	MJ surplus	0.439565	1.64968	-1.21682	0.000106419	0.00660588		Fossil fuel depletion	MJ surplus	-1.21682	0	-1.21708	0	8.89274e-05	0.000172612		Fossil fuel depletion	MJ surplus	-1.21708	0	0.00107893	-1.21823	6.75384e-05
Outputs:	Amount	Unit	Comments	Source
CO2 From DAC - MW - PV	1	kg		Definition
Avoided Products:	Amount	Unit	Comments	Source
Inputs - Materials:	Amount	Unit	Comments	Source
Inputs - Electricity/Heat	Amount	Unit	Comments	Source
Electricity, medium voltage {US}| market group for | Cut-off, S	0	kWh	Blowers/other electrical
Electricity, medium voltage {US}| market group for | Cut-off, S	0	MJ	MW heat load, 4.8 MJ
Emissions to Air	Amount	Unit	Comments	Source
Carbon dioxide	-1	kg		Definition
Assembly:	Amount	Units	Comments	Source
DAC Construction Total - Full PV, MW, Tuscaloosa	1	p
Inputs:	Amount	Units	Comments	Source
Photovoltaic plant, 570kWp, multi-Si, on open ground {GLO}| market for | Cut-off, S	44.6246	p		Global Solar Atlas
Concrete block {RoW}| market for concrete block | Cut-off, S	260	ton
Steel, unalloyed {GLO}| market for | Cut-off, S	150000	kg
Aluminium, primary, ingot {IAI Area, North America}| market for aluminium, primary, ingot | Cut-off, S	64000	kg
Copper-rich materials {GLO}| market for copper-rich materials | Cut-off, S	500	kg
Stone wool {GLO}| market for stone wool | Cut-off, S	400	kg
Adhesive, for metal {RoW}| market for adhesive, for metal | Cut-off, S	80	kg
Alkyd paint, white, without solvent, in 60% solution state {RoW}| market for alkyd paint, white, without solvent, in 60% solution state | Cut-off, S	100	kg
Polyurethane, flexible foam {RoW}| market for polyurethane, flexible foam | Cut-off, S	100	kg
Calciner	1	p
Fan	6	p
Pellet Reactor	1	p
Slaker	1	p
Microwave oven {GLO}| market for microwave oven | Cut-off, S	3041.6	p	1000 tonnes/yr=114.2 kg/h, 114.2 kg/h*23.97 MJ/kg=760.4 kW
Methanol factory {GLO}| market for | Cut-off, S	0.973311	p	Scaled down to production rate of CO2
Processes:	Amount	Units	Comments	Source
Machine operation, diesel, < 18.64 kW, low load factor {GLO}| market for | Cut-off, S	1000	hr	Construction equipment
PV EOL	1398980	kg	22 kg per 0.400 kWp or 55 kg per kWp
Assembly:
Zeolite 13X Manufacturing
Materials:	Amount	Unit	Comments	Source
Zeolite, powder {GLO}| market for | Cut-off, S	1	g		Gonzalez-Olmos
Outputs:	Amount	Units	Comments	Source
Hydrogen Gas Production - HTHP - Grid	104	kg
Avoided Products:	Amount	Units	Comments	Source
Oxygen, liquid {RoW}| market for | Cut-off, S	821	kg		Aspen Model
Inputs - Materials:	Amount	Units	Comments	Source
Water, deionised {RoW}| market for water, deionised | Cut-off, S	1037	kg		Aspen Model
Inputs - Electricity/Heat:	Amount	Unit	Comments	Source
Electricity, medium voltage {US}| market group for | Cut-off, S	5906	kWh	Total electrical demand	Aspen Model
Emissions To Air:	Amount	Unit	Comments	Source
Carbon dioxide	0	kg		Aspen Model
Outputs: Waste	Amount	Unit	Comments	Source
Wastewater, unpolluted {RoW}| market for wastewater, unpolluted | Cut-off, S	0.1103	m3		Aspen Model
Outputs:	Amount	Units	Comments	Source
Methanol Production - MW - PV	500	kg
Inputs - Materials:	Amount	Units	Comments	Source
Hydrogen Gas Production - HTHP - Grid	104	kg		Aspen Model
CO2 From DAC - MW - PV	723	kg		Aspen Model
Copper-rich materials {GLO}| copper, anode to generic market for copper-rich materials | Cut-off, S	8.3447	g	Catalyst	Sollai 2023
Inputs - Electricity/Heat:	Amount	Unit	Comments	Source
Electricity, medium voltage {US}| market group for | Cut-off, S	0	kWh	108.64 kWh total electrical demand	Aspen Model
Emissions To Air:	Amount	Unit	Comments	Source
Carbon dioxide	36.32	kg		Aspen Model
Hydrogen	9.64	kg		Aspen Model
Outputs: Waste and Emissions:	Amount	Unit	Comments	Source
Wastewater, unpolluted {RoW}| market for wastewater, unpolluted | Cut-off, S	0.2819	m3
Life Cycle:	Amount	Unit	Comments	Source
Zeolite Life Cycle	1	p
Assembly:
Zeolite 13X Manufacturing	1	p
Waste/Disposal Scenario:
Zeolite 13X Sorbent EOL
Disposal Scenario:	Amount	Unit	Comments	Source
Zeolite 13X Sorbent EOL	1	p
Referring to Assembly:
Zeolite 13X Manufacturing
Waste Scenarios:	Percentage:		Comments	Source
Municipal solid waste (waste scenario) {RoW}| Treatment of municipal solid waste, landfill | Cut-off, S	1			Gonzalez-Olmos
Disposal Scenario:	Amount	Unit	Comments	Source
DAC EOL - Full PV, MW, Tuscaloosa	1	p
Referring to Assembly:
DAC Construction Total - Full PV, MW, Tuscaloosa
Waste Scenarios:	Percentage:		Comments	Source
DAC EOL	1
Waste Scenario:	Amount	Unit	Comments	Source
DAC EOL	1	kg
Materials and/or Waste Types:	Material/Waste Type	Percentage
Aluminium (waste treatment) {GLO}| recycling of aluminium | Cut-off, S	Aluminium	1
Steel and iron (waste treatment) {GLO}| recycling of steel and iron | Cut-off, S	Steel	1
Scrap copper {RoW}| treatment of, municipal incineration | Cut-off, S	Coppers	1
Waste concrete {RoW}| treatment of, inert material landfill | Cut-off, S	Cement	1
Waste Streams Remaining After Separation:	Percentage
Municipal solid waste (waste scenario) {RoW}| Treatment of municipal solid waste, landfill | Cut-off, S	1
Products:	Amount	Unit	Comments	Source
PV EOL	1000	kg
Avoided Products:	Amount	Unit	Comments	Source
Aluminium scrap, new {GLO}| aluminium scrap, new, Recycled Content cut-off | Cut-off, S	182.7	kg		Rossi 2020
Copper scrap, sorted, pressed {GLO}| copper scrap, sorted, pressed, Recycled Content cut-off | Cut-off, S	4.4	kg		Rossi 2020
Glass cullet, for Saint-Gobain ISOVER SA {GLO}| market for | Cut-off, S	686	kg		Rossi 2020
Materials/Fuels:	Amount	Unit	Comments	Source
Diesel {RoW}| market for | Cut-off, S	0.948	kg		Rossi 2020
Diesel, burned in building machine {GLO}| processing | Cut-off, S	41	MF		Rossi 2020
Electricity/Heat	Amount	Unit	Comments	Source
Electricity, low voltage {US}| market group for | Cut-off, S	113.55	kWh		Rossi 2020
Waste and Emissions to Treatment:	Amount	Unit	Comments	Source
Waste electric wiring {RoW}| treatment of, collection for final disposal | Cut-off, S	0.6	kg		Rossi 2020
Waste packaging glass, unsorted {GLO}| market for | Cut-off, S	14	kg		Rossi 2020
Waste plastic, mixture {GLO}| treatment of waste plastic, mixture, unsanitary landfill, dry infiltration class (100mm) | Cut-off, S	51	kg		Rossi 2020
Waste polyvinylchloride {GLO}| treatment of waste polyvinylchloride, unsanitary landfill, dry infiltration class (100mm) | Cut-off, S	15	kg		Rossi 2020
Life Cycle:	Amount	Unit	Comments	Source
LCA per kg - MW - PV - Tuscaloosa	1	p
Assembly:
DAC Construction Total - Full PV, MW, Tuscaloosa	1.90263e-08	p
Processes:	Amount	Unit	Comments	Source
Methanol Production - MW - PV	1	kg
Waste/Disposal Scenario:			Comments	Source
DAC EOL - Full PV, MW, Tuscaloosa
Additional Life Cycles:	Amount	Unit	Comments	Source
Zeolite Life Cycle	1.13945			Gonzalez-Olmos 2022

## Sheet: PV+Waste Heat (AL)
Calculation:	Analyze							Calculation:	Analyze								Calculation:	Analyze
Results:	Impact assessment							Results:	Impact assessment								Results:	Impact assessment
Product:	1 p LCA per kg - Waste Heat - PV - AL (of project Nick - DAC + Methanol LCA kg Methanol 3.0)							Product:	1 kg Methanol Production - Waste Heat - PV (of project Nick - DAC + Methanol LCA kg Methanol 3.0)								Product:	0.208 kg Hydrogen Gas Production - Waste Heat - PV (of project Nick - DAC + Methanol LCA kg Methanol 3.0)
Method:	TRACI 2.1 Updated V1.07 / US 2008							Method:	TRACI 2.1 Updated V1.07 / US 2008								Method:	TRACI 2.1 Updated V1.07 / US 2008
Indicator:	Characterization							Indicator:	Characterization								Indicator:	Characterization
Skip categories:	Never							Skip categories:	Never								Skip categories:	Never
Exclude infrastructure processes:	No							Exclude infrastructure processes:	No								Exclude infrastructure processes:	No
Exclude long-term emissions:	No							Exclude long-term emissions:	No								Exclude long-term emissions:	No
Sorted on item:	Impact category							Sorted on item:	Impact category								Sorted on item:	Impact category
Sort order:	Ascending							Sort order:	Ascending								Sort order:	Ascending
Impact category	Unit	Total	DAC Construction Total - PV, Waste Heat, AL	Methanol Production - Waste Heat - PV (AL)	DAC EOL - Full PV, Gas, Tuscaloosa	Zeolite Life Cycle		Impact category	Unit	Total	Methanol Production - Waste Heat - PV	Hydrogen Gas Production - Waste Heat - PV	CO2 From DAC - Waste Heat - PV	Copper-rich materials {GLO}| copper, anode to generic market for copper-rich materials | Cut-off, S	Wastewater, unpolluted {RoW}| market for wastewater, unpolluted | Cut-off, S		Impact category	Unit	Total	Hydrogen Gas Production - Waste Heat - PV	Water, deionised {RoW}| market for water, deionised | Cut-off, S	Oxygen, liquid {RoW}| air separation, cryogenic | Cut-off, S	Wastewater, unpolluted {RoW}| market for wastewater, unpolluted | Cut-off, S
Ozone depletion	kg CFC-11 eq	1.35281e-07	1.71613e-07	-3.78703e-08	1.11905e-11	1.52634e-09		Ozone depletion	kg CFC-11 eq	-3.78703e-08	0	-6.41788e-08	2.6291e-08	5.87438e-12	1.15706e-11		Ozone depletion	kg CFC-11 eq	-6.41788e-08	0	5.20769e-10	-6.47041e-08	4.52728e-12
Global warming	kg CO2 eq	-1.22257	1.86884	-3.09857	3.36956e-05	0.00712792		Global warming	kg CO2 eq	-3.09857	0.07264	-2.02688	-1.14463	0.000108121	0.000193295		Global warming	kg CO2 eq	-2.02688	0	0.00107295	-2.02803	7.56312e-05
Smog	kg O3 eq	0.0422489	0.131606	-0.0897534	5.43624e-06	0.000390907		Smog	kg O3 eq	-0.0897534	0	-0.0984367	0.00864764	2.41141e-05	1.15132e-05		Smog	kg O3 eq	-0.0984367	0	5.76698e-05	-0.0984989	4.50482e-06
Acidification	kg SO2 eq	0.00653458	0.0132003	-0.00669756	2.20104e-07	3.15754e-05		Acidification	kg SO2 eq	-0.00669756	0	-0.00756914	0.000861202	9.69121e-06	6.91734e-07		Acidification	kg SO2 eq	-0.00756914	0	7.01759e-06	-0.00757643	2.70657e-07
Eutrophication	kg N eq	0.00377961	0.00929133	-0.00553965	1.86357e-07	2.77471e-05		Eutrophication	kg N eq	-0.00553965	0	-0.00583455	0.00028949	4.53745e-06	8.7095e-07		Eutrophication	kg N eq	-0.00583455	0	3.59029e-06	-0.00583848	3.4078e-07
Carcinogenics	CTUh	1.18836e-06	1.27714e-06	-9.16361e-08	2.11662e-12	2.85782e-09		Carcinogenics	CTUh	-9.16361e-08	0	-9.69247e-08	5.09995e-09	9.20478e-11	9.66484e-11		Carcinogenics	CTUh	-9.69247e-08	0	1.74758e-10	-9.71373e-08	3.7816e-11
Non carcinogenics	CTUh	1.93407e-06	2.22794e-06	-2.98606e-07	3.37324e-11	4.6973e-09		Non carcinogenics	CTUh	-2.98606e-07	0	-3.33235e-07	3.21946e-08	2.36753e-09	6.6493e-11		Non carcinogenics	CTUh	-3.33235e-07	0	7.49745e-10	-3.34011e-07	2.60169e-11
Respiratory effects	kg PM2.5 eq	0.000187758	0.00276475	-0.00258255	2.92029e-08	5.52923e-06		Respiratory effects	kg PM2.5 eq	-0.00258255	0	-0.00268555	0.000101783	9.97937e-07	2.1799e-07		Respiratory effects	kg PM2.5 eq	-0.00268555	0	1.23054e-06	-0.00268687	8.52936e-08
Ecotoxicity	CTUe	186.635	197.491	-11.5387	0.363807	0.318554		Ecotoxicity	CTUe	-11.5387	0	-12.2763	0.572499	0.159676	0.00548362		Ecotoxicity	CTUe	-12.2763	0	0.0457981	-12.3243	0.00214559
Fossil fuel depletion	MJ surplus	0.746775	1.51331	-0.773242	0.000106419	0.00660588		Fossil fuel depletion	MJ surplus	-0.773242	0	-1.21708	0.44358	8.89274e-05	0.000172612		Fossil fuel depletion	MJ surplus	-1.21708	0	0.00107893	-1.21823	6.75384e-05
Outputs:	Amount	Unit	Comments	Source
CO2 From DAC - Waste Heat - PV	1	kg		Definition
Avoided Products:	Amount	Unit	Comments	Source
Inputs - Materials:	Amount	Unit	Comments	Source
Inputs - Electricity/Heat	Amount	Unit	Comments	Source
Electricity, medium voltage {US}| market group for | Cut-off, S	0	kWh	Blowers/other electrical
Heat, from steam, in chemical industry {RoW}| market for heat, from steam, in chemical industry | Cut-off, S	1.55165	MJ	Exergy calculation
Emissions to Air	Amount	Unit	Comments	Source
Carbon dioxide	-1	kg		Definition
Assembly:	Amount	Units	Comments	Source
DAC Construction Total - Full PV, Gas, Tuscaloosa	1	p
Inputs:	Amount	Units	Comments	Source
Photovoltaic plant, 570kWp, multi-Si, on open ground {GLO}| market for | Cut-off, S	38.7912	p		Global Solar Atlas
Concrete block {RoW}| market for concrete block | Cut-off, S	260	ton
Steel, unalloyed {GLO}| market for | Cut-off, S	150000	kg
Aluminium, primary, ingot {IAI Area, North America}| market for aluminium, primary, ingot | Cut-off, S	64000	kg
Copper-rich materials {GLO}| market for copper-rich materials | Cut-off, S	500	kg
Stone wool {GLO}| market for stone wool | Cut-off, S	400	kg
Adhesive, for metal {RoW}| market for adhesive, for metal | Cut-off, S	80	kg
Alkyd paint, white, without solvent, in 60% solution state {RoW}| market for alkyd paint, white, without solvent, in 60% solution state | Cut-off, S	100	kg
Polyurethane, flexible foam {RoW}| market for polyurethane, flexible foam | Cut-off, S	100	kg
Calciner	1	p
Fan	6	p
Pellet Reactor	1	p
Slaker	1	p
Methanol factory {GLO}| market for | Cut-off, S	0.973311	p	Scaled down to production rate of CO2
Processes:	Amount	Units	Comments	Source
Machine operation, diesel, < 18.64 kW, low load factor {GLO}| market for | Cut-off, S	1000	hr	Construction equipment
PV EOL	1216110	kg	22 kg per 0.400 kWp or 55 kg per kWp
Assembly:
Zeolite 13X Manufacturing
Materials:	Amount	Unit	Comments	Source
Zeolite, powder {GLO}| market for | Cut-off, S	1	g		Gonzalez-Olmos
Outputs:	Amount	Units	Comments	Source
Hydrogen Gas Production - Waste Heat - Grid	104	kg
Avoided Products:	Amount	Units	Comments	Source
Oxygen, liquid {RoW}| market for | Cut-off, S	821	kg		Aspen Model
Inputs - Materials:	Amount	Units	Comments	Source
Water, deionised {RoW}| market for water, deionised | Cut-off, S	1037	kg		Aspen Model
Inputs - Electricity/Heat:	Amount	Unit	Comments	Source
Electricity, medium voltage {US}| market group for | Cut-off, S	5906	kWh	Total electrical demand	Aspen Model
Emissions To Air:	Amount	Unit	Comments	Source
Carbon dioxide	0	kg		Aspen Model
Outputs: Waste	Amount	Unit	Comments	Source
Wastewater, unpolluted {RoW}| market for wastewater, unpolluted | Cut-off, S	0.1103	m3		Aspen Model
Outputs:	Amount	Units	Comments	Source
Methanol Production - Waste Heat - PV	500	kg
Inputs - Materials:	Amount	Units	Comments	Source
Hydrogen Gas Production - Waste Heat - Grid	104	kg		Aspen Model
CO2 From DAC - Waste Heat - PV	723	kg		Aspen Model
Copper-rich materials {GLO}| copper, anode to generic market for copper-rich materials | Cut-off, S	8.3447	g	Catalyst	Sollai 2023
Inputs - Electricity/Heat:	Amount	Unit	Comments	Source
Electricity, medium voltage {US}| market group for | Cut-off, S	0	kWh	108.64 kWh total electrical demand	Aspen Model
Emissions To Air:	Amount	Unit	Comments	Source
Carbon dioxide	36.32	kg		Aspen Model
Hydrogen	9.64	kg		Aspen Model
Outputs: Waste and Emissions:	Amount	Unit	Comments	Source
Wastewater, unpolluted {RoW}| market for wastewater, unpolluted | Cut-off, S	0.2819	m3
Life Cycle:	Amount	Unit	Comments	Source
Zeolite Life Cycle	1	p
Assembly:
Zeolite 13X Manufacturing	1	p
Waste/Disposal Scenario:
Zeolite 13X Sorbent EOL
Disposal Scenario:	Amount	Unit	Comments	Source
Zeolite 13X Sorbent EOL	1	p
Referring to Assembly:
Zeolite 13X Manufacturing
Waste Scenarios:	Percentage:		Comments	Source
Municipal solid waste (waste scenario) {RoW}| Treatment of municipal solid waste, landfill | Cut-off, S	1			Gonzalez-Olmos
Disposal Scenario:	Amount	Unit	Comments	Source
DAC EOL - Full PV, Waste Heat, Tuscaloosa	1	p
Referring to Assembly:
DAC Construction Total - Full PV, Waste Heat, Tuscaloosa
Waste Scenarios:	Percentage:		Comments	Source
DAC EOL	1
Waste Scenario:	Amount	Unit	Comments	Source
DAC EOL	1	kg
Materials and/or Waste Types:	Material/Waste Type	Percentage
Aluminium (waste treatment) {GLO}| recycling of aluminium | Cut-off, S	Aluminium	1
Steel and iron (waste treatment) {GLO}| recycling of steel and iron | Cut-off, S	Steel	1
Scrap copper {RoW}| treatment of, municipal incineration | Cut-off, S	Coppers	1
Waste concrete {RoW}| treatment of, inert material landfill | Cut-off, S	Cement	1
Waste Streams Remaining After Separation:	Percentage
Municipal solid waste (waste scenario) {RoW}| Treatment of municipal solid waste, landfill | Cut-off, S	1
Products:	Amount	Unit	Comments	Source
PV EOL	1000	kg
Avoided Products:	Amount	Unit	Comments	Source
Aluminium scrap, new {GLO}| aluminium scrap, new, Recycled Content cut-off | Cut-off, S	182.7	kg		Rossi 2020
Copper scrap, sorted, pressed {GLO}| copper scrap, sorted, pressed, Recycled Content cut-off | Cut-off, S	4.4	kg		Rossi 2020
Glass cullet, for Saint-Gobain ISOVER SA {GLO}| market for | Cut-off, S	686	kg		Rossi 2020
Materials/Fuels:	Amount	Unit	Comments	Source
Diesel {RoW}| market for | Cut-off, S	0.948	kg		Rossi 2020
Diesel, burned in building machine {GLO}| processing | Cut-off, S	41	MF		Rossi 2020
Electricity/Heat	Amount	Unit	Comments	Source
Electricity, low voltage {US}| market group for | Cut-off, S	113.55	kWh		Rossi 2020
Waste and Emissions to Treatment:	Amount	Unit	Comments	Source
Waste electric wiring {RoW}| treatment of, collection for final disposal | Cut-off, S	0.6	kg		Rossi 2020
Waste packaging glass, unsorted {GLO}| market for | Cut-off, S	14	kg		Rossi 2020
Waste plastic, mixture {GLO}| treatment of waste plastic, mixture, unsanitary landfill, dry infiltration class (100mm) | Cut-off, S	51	kg		Rossi 2020
Waste polyvinylchloride {GLO}| treatment of waste polyvinylchloride, unsanitary landfill, dry infiltration class (100mm) | Cut-off, S	15	kg		Rossi 2020
Life Cycle:	Amount	Unit	Comments	Source
LCA per kg - Waste Heat - PV - Tuscaloosa	1	p
Assembly:
DAC Construction Total - Full PV, Waste Heat, Tuscaloosa	1.90263e-08	p
Processes:	Amount	Unit	Comments	Source
Methanol Production - Waste Heat - PV	1	kg
Waste/Disposal Scenario:			Comments	Source
DAC EOL - Full PV, Waste Heat, Tuscaloosa
Additional Life Cycles:	Amount	Unit	Comments	Source
Zeolite Life Cycle	1.13945			Gonzalez-Olmos 2022

## Sheet: PV+MW (AZ)
Calculation:	Analyze							Calculation:	Analyze								Calculation:	Analyze
Results:	Impact assessment							Results:	Impact assessment								Results:	Impact assessment
Product:	1 p LCA per kg - MW - PV - AZ (of project Nick - DAC + Methanol LCA kg Methanol 3.0)							Product:	1 kg Methanol Production - MW - PV (of project Nick - DAC + Methanol LCA kg Methanol 3.0)								Product:	0.208 kg Hydrogen Gas Production - MW - PV (of project Nick - DAC + Methanol LCA kg Methanol 3.0)
Method:	TRACI 2.1 Updated V1.07 / US 2008							Method:	TRACI 2.1 Updated V1.07 / US 2008								Method:	TRACI 2.1 Updated V1.07 / US 2008
Indicator:	Characterization							Indicator:	Characterization								Indicator:	Characterization
Skip categories:	Never							Skip categories:	Never								Skip categories:	Never
Exclude infrastructure processes:	No							Exclude infrastructure processes:	No								Exclude infrastructure processes:	No
Exclude long-term emissions:	No							Exclude long-term emissions:	No								Exclude long-term emissions:	No
Sorted on item:	Impact category							Sorted on item:	Impact category								Sorted on item:	Impact category
Sort order:	Ascending							Sort order:	Ascending								Sort order:	Ascending
Impact category	Unit	Total	DAC Construction Total - PV, MW, AZ	Methanol Production - MW - PV	DAC EOL - Full PV, MW, Phoenix	Zeolite Life Cycle		Impact category	Unit	Total	Methanol Production - MW - PV	Hydrogen Gas Production - MW - PV	CO2 From DAC - MW - PV	Copper-rich materials {GLO}| copper, anode to generic market for copper-rich materials | Cut-off, S	Wastewater, unpolluted {RoW}| market for wastewater, unpolluted | Cut-off, S		Impact category	Unit	Total	Hydrogen Gas Production - MW - PV	Water, deionised {RoW}| market for water, deionised | Cut-off, S	Oxygen, liquid {RoW}| air separation, cryogenic | Cut-off, S	Wastewater, unpolluted {RoW}| market for wastewater, unpolluted | Cut-off, S
Ozone depletion	kg CFC-11 eq	1.0057e-07	1.63194e-07	-6.41613e-08	1.11905e-11	1.52634e-09		Ozone depletion	kg CFC-11 eq	-6.41613e-08	0	-6.41788e-08	0	5.87438e-12	1.15706e-11		Ozone depletion	kg CFC-11 eq	-6.41788e-08	0	5.20769e-10	-6.47041e-08	4.52728e-12
Global warming	kg CO2 eq	-1.5993	1.79348	-3.39994	3.36956e-05	0.00712792		Global warming	kg CO2 eq	-3.39994	0.07264	-2.02688	-1.446	0.000108121	0.000193295		Global warming	kg CO2 eq	-2.02688	0	0.00107295	-2.02803	7.56312e-05
Smog	kg O3 eq	0.0295543	0.127559	-0.0984011	5.43624e-06	0.000390907		Smog	kg O3 eq	-0.0984011	0	-0.0984367	0	2.41141e-05	1.15132e-05		Smog	kg O3 eq	-0.0984367	0	5.76698e-05	-0.0984989	4.50482e-06
Acidification	kg SO2 eq	0.00531725	0.0128442	-0.00755876	2.20104e-07	3.15754e-05		Acidification	kg SO2 eq	-0.00755876	0	-0.00756914	0	9.69121e-06	6.91734e-07		Acidification	kg SO2 eq	-0.00756914	0	7.01759e-06	-0.00757643	2.70657e-07
Eutrophication	kg N eq	0.00320937	0.00901058	-0.00582914	1.86357e-07	2.77471e-05		Eutrophication	kg N eq	-0.00582914	0	-0.00583455	0	4.53745e-06	8.7095e-07		Eutrophication	kg N eq	-0.00583455	0	3.59029e-06	-0.00583848	3.4078e-07
Carcinogenics	CTUh	1.16874e-06	1.26261e-06	-9.6736e-08	2.11662e-12	2.85782e-09		Carcinogenics	CTUh	-9.6736e-08	0	-9.69247e-08	0	9.20478e-11	9.66484e-11		Carcinogenics	CTUh	-9.69247e-08	0	1.74758e-10	-9.71373e-08	3.7816e-11
Non carcinogenics	CTUh	1.86146e-06	2.18753e-06	-3.30801e-07	3.37324e-11	4.6973e-09		Non carcinogenics	CTUh	-3.30801e-07	0	-3.33235e-07	0	2.36753e-09	6.6493e-11		Non carcinogenics	CTUh	-3.33235e-07	0	7.49745e-10	-3.34011e-07	2.60169e-11
Respiratory effects	kg PM2.5 eq	5.7702e-06	0.00268455	-0.00268434	2.92029e-08	5.52923e-06		Respiratory effects	kg PM2.5 eq	-0.00268434	0	-0.00268555	0	9.97937e-07	2.1799e-07		Respiratory effects	kg PM2.5 eq	-0.00268555	0	1.23054e-06	-0.00268687	8.52936e-08
Ecotoxicity	CTUe	182.901	194.329	-12.1112	0.363807	0.318554		Ecotoxicity	CTUe	-12.1112	0	-12.2763	0	0.159676	0.00548362		Ecotoxicity	CTUe	-12.2763	0	0.0457981	-12.3243	0.00214559
Fossil fuel depletion	MJ surplus	0.240765	1.45088	-1.21682	0.000106419	0.00660588		Fossil fuel depletion	MJ surplus	-1.21682	0	-1.21708	0	8.89274e-05	0.000172612		Fossil fuel depletion	MJ surplus	-1.21708	0	0.00107893	-1.21823	6.75384e-05
Outputs:	Amount	Unit	Comments	Source
CO2 From DAC - MW - PV	1	kg		Definition
Avoided Products:	Amount	Unit	Comments	Source
Inputs - Materials:	Amount	Unit	Comments	Source
Inputs - Electricity/Heat	Amount	Unit	Comments	Source
Electricity, medium voltage {US}| market group for | Cut-off, S	0	kWh	Blowers/other electrical
Electricity, medium voltage {US}| market group for | Cut-off, S	0	MJ	MW heat load, 4.8 MJ
Emissions to Air	Amount	Unit	Comments	Source
Carbon dioxide	-1	kg		Definition
Assembly:	Amount	Units	Comments	Source
DAC Construction Total - Full PV, MW, Tuscaloosa	1	p
Inputs:	Amount	Units	Comments	Source
Photovoltaic plant, 570kWp, multi-Si, on open ground {GLO}| market for | Cut-off, S	35.9491	p		Global Solar Atlas
Concrete block {RoW}| market for concrete block | Cut-off, S	260	ton
Steel, unalloyed {GLO}| market for | Cut-off, S	150000	kg
Aluminium, primary, ingot {IAI Area, North America}| market for aluminium, primary, ingot | Cut-off, S	64000	kg
Copper-rich materials {GLO}| market for copper-rich materials | Cut-off, S	500	kg
Stone wool {GLO}| market for stone wool | Cut-off, S	400	kg
Adhesive, for metal {RoW}| market for adhesive, for metal | Cut-off, S	80	kg
Alkyd paint, white, without solvent, in 60% solution state {RoW}| market for alkyd paint, white, without solvent, in 60% solution state | Cut-off, S	100	kg
Polyurethane, flexible foam {RoW}| market for polyurethane, flexible foam | Cut-off, S	100	kg
Calciner	1	p
Fan	6	p
Pellet Reactor	1	p
Slaker	1	p
Microwave oven {GLO}| market for microwave oven | Cut-off, S	3041.6	p	1000 tonnes/yr=114.2 kg/h, 114.2 kg/h*23.97 MJ/kg=760.4 kW
Methanol factory {GLO}| market for | Cut-off, S	0.973311	p	Scaled down to production rate of CO2
Processes:	Amount	Units	Comments	Source
Machine operation, diesel, < 18.64 kW, low load factor {GLO}| market for | Cut-off, S	1000	hr	Construction equipment
PV EOL	1127010	kg	22 kg per 0.400 kWp or 55 kg per kWp
Assembly:
Zeolite 13X Manufacturing
Materials:	Amount	Unit	Comments	Source
Zeolite, powder {GLO}| market for | Cut-off, S	1	g		Gonzalez-Olmos
Outputs:	Amount	Units	Comments	Source
Hydrogen Gas Production - HTHP - Grid	104	kg
Avoided Products:	Amount	Units	Comments	Source
Oxygen, liquid {RoW}| market for | Cut-off, S	821	kg		Aspen Model
Inputs - Materials:	Amount	Units	Comments	Source
Water, deionised {RoW}| market for water, deionised | Cut-off, S	1037	kg		Aspen Model
Inputs - Electricity/Heat:	Amount	Unit	Comments	Source
Electricity, medium voltage {US}| market group for | Cut-off, S	5906	kWh	Total electrical demand	Aspen Model
Emissions To Air:	Amount	Unit	Comments	Source
Carbon dioxide	0	kg		Aspen Model
Outputs: Waste	Amount	Unit	Comments	Source
Wastewater, unpolluted {RoW}| market for wastewater, unpolluted | Cut-off, S	0.1103	m3		Aspen Model
Outputs:	Amount	Units	Comments	Source
Methanol Production - MW - PV	500	kg
Inputs - Materials:	Amount	Units	Comments	Source
Hydrogen Gas Production - HTHP - Grid	104	kg		Aspen Model
CO2 From DAC - MW - PV	723	kg		Aspen Model
Copper-rich materials {GLO}| copper, anode to generic market for copper-rich materials | Cut-off, S	8.3447	g	Catalyst	Sollai 2023
Inputs - Electricity/Heat:	Amount	Unit	Comments	Source
Electricity, medium voltage {US}| market group for | Cut-off, S	0	kWh	108.64 kWh total electrical demand	Aspen Model
Emissions To Air:	Amount	Unit	Comments	Source
Carbon dioxide	36.32	kg		Aspen Model
Hydrogen	9.64	kg		Aspen Model
Outputs: Waste and Emissions:	Amount	Unit	Comments	Source
Wastewater, unpolluted {RoW}| market for wastewater, unpolluted | Cut-off, S	0.2819	m3
Life Cycle:	Amount	Unit	Comments	Source
Zeolite Life Cycle	1	p
Assembly:
Zeolite 13X Manufacturing	1	p
Waste/Disposal Scenario:
Zeolite 13X Sorbent EOL
Disposal Scenario:	Amount	Unit	Comments	Source
Zeolite 13X Sorbent EOL	1	p
Referring to Assembly:
Zeolite 13X Manufacturing
Waste Scenarios:	Percentage:		Comments	Source
Municipal solid waste (waste scenario) {RoW}| Treatment of municipal solid waste, landfill | Cut-off, S	1			Gonzalez-Olmos
Disposal Scenario:	Amount	Unit	Comments	Source
DAC EOL - Full PV, MW, Phoenix	1	p
Referring to Assembly:
DAC Construction Total - Full PV, MW, Phoenix
Waste Scenarios:	Percentage:		Comments	Source
DAC EOL	1
Waste Scenario:	Amount	Unit	Comments	Source
DAC EOL	1	kg
Materials and/or Waste Types:	Material/Waste Type	Percentage
Aluminium (waste treatment) {GLO}| recycling of aluminium | Cut-off, S	Aluminium	1
Steel and iron (waste treatment) {GLO}| recycling of steel and iron | Cut-off, S	Steel	1
Scrap copper {RoW}| treatment of, municipal incineration | Cut-off, S	Coppers	1
Waste concrete {RoW}| treatment of, inert material landfill | Cut-off, S	Cement	1
Waste Streams Remaining After Separation:	Percentage
Municipal solid waste (waste scenario) {RoW}| Treatment of municipal solid waste, landfill | Cut-off, S	1
Products:	Amount	Unit	Comments	Source
PV EOL	1000	kg
Avoided Products:	Amount	Unit	Comments	Source
Aluminium scrap, new {GLO}| aluminium scrap, new, Recycled Content cut-off | Cut-off, S	182.7	kg		Rossi 2020
Copper scrap, sorted, pressed {GLO}| copper scrap, sorted, pressed, Recycled Content cut-off | Cut-off, S	4.4	kg		Rossi 2020
Glass cullet, for Saint-Gobain ISOVER SA {GLO}| market for | Cut-off, S	686	kg		Rossi 2020
Materials/Fuels:	Amount	Unit	Comments	Source
Diesel {RoW}| market for | Cut-off, S	0.948	kg		Rossi 2020
Diesel, burned in building machine {GLO}| processing | Cut-off, S	41	MF		Rossi 2020
Electricity/Heat	Amount	Unit	Comments	Source
Electricity, low voltage {US}| market group for | Cut-off, S	113.55	kWh		Rossi 2020
Waste and Emissions to Treatment:	Amount	Unit	Comments	Source
Waste electric wiring {RoW}| treatment of, collection for final disposal | Cut-off, S	0.6	kg		Rossi 2020
Waste packaging glass, unsorted {GLO}| market for | Cut-off, S	14	kg		Rossi 2020
Waste plastic, mixture {GLO}| treatment of waste plastic, mixture, unsanitary landfill, dry infiltration class (100mm) | Cut-off, S	51	kg		Rossi 2020
Waste polyvinylchloride {GLO}| treatment of waste polyvinylchloride, unsanitary landfill, dry infiltration class (100mm) | Cut-off, S	15	kg		Rossi 2020
Life Cycle:	Amount	Unit	Comments	Source
LCA per kg - MW - PV - Phoenix	1	p
Assembly:
DAC Construction Total - Full PV, MW, Phoenix	1.90263e-08	p
Processes:	Amount	Unit	Comments	Source
Methanol Production - MW - PV	1	kg
Waste/Disposal Scenario:			Comments	Source
DAC EOL - Full PV, MW, Phoenix
Additional Life Cycles:	Amount	Unit	Comments	Source
Zeolite Life Cycle	1.13945			Gonzalez-Olmos 2022

[truncated: 9 more sheets: PV+Waste Heat (AZ), Wind+MW, Wind+Waste Heat, Hydro+MW, Hydro+Waste Heat, Geothermal+MW, Geothermal+Waste Heat, Construction Sensitivity Hydro, Lifetime Sensitivity]
